# The Carotid Body Detects Circulating Tumor Necrosis Factor-Alpha to Activate a Sympathetic Anti-Inflammatory Reflex

Pedro L. Katayama<sup>1</sup>, Isabela P. Leirão<sup>1</sup>, Alexandre Kanashiro<sup>2</sup>, João Paulo M. Luiz<sup>3</sup>, Fernando Q. Cunha<sup>3</sup>, Luiz C. C. Navegantes<sup>4</sup>, Jose V. Menani<sup>1</sup>, Daniel B. Zoccal<sup>1</sup>, Débora S. A. Colombari<sup>1</sup> & Eduardo Colombari<sup>1</sup>

## Affiliations

<sup>1</sup>Department of Physiology and Pathology, School of Dentistry, São Paulo State University, Araraquara, São Paulo, Brazil.

<sup>2</sup>Department of Neurosciences and Behavior, Ribeirão Preto Medical School, University of São Paulo, Ribeirão Preto, São Paulo, Brazil

<sup>3</sup>Department of Pharmacology, Ribeirão Preto Medical School, University of São Paulo, Ribeirão Preto, São Paulo, Brazil.

<sup>4</sup>Department of Physiology, Ribeirão Preto Medical School, University of São Paulo, Ribeirão Preto, São Paulo, Brazil.

## Corresponding authors

Pedro L. Katayama & Eduardo Colombari  
Department of Physiology and Pathology, School of Dentistry, São Paulo State University, Rua Humaita, 1680, Centro, Araraquara/SP, Brazil – Postal code: 14801-903. emails: katayamapl@gmail.com; eduardo.colombari@unesp.br

39 **Abstract**

40 Recent evidence has suggested that the carotid bodies might act as immunological  
41 sensors, detecting pro-inflammatory mediators and signalling to the central nervous  
42 system, which, in turn, orchestrates autonomic responses. Here, we demonstrated  
43 that the TNF- $\alpha$  receptor type I is expressed in the carotid bodies of rats. The systemic  
44 administration of TNF- $\alpha$  increased carotid body afferent discharge and activated  
45 glutamatergic neurons in the nucleus tractus solitarius (NTS) that project to the rostral  
46 ventrolateral medulla (RVLM), where the majority of pre-sympathetic neurons reside.  
47 The activation of these neurons was accompanied by generalized activation of the  
48 sympathetic nervous system. Carotid body ablation blunted the TNF- $\alpha$ -induced  
49 activation of RVLM-projecting NTS neurons and the increase in splanchnic  
50 sympathetic nerve activity. Finally, plasma and spleen levels of cytokines after TNF- $\alpha$   
51 administration were higher in rats subjected to either carotid body ablation or  
52 splanchnic sympathetic denervation. Collectively, our findings indicate that the carotid  
53 body detects circulating TNF- $\alpha$  to activate a counteracting sympathetic anti-  
54 inflammatory mechanism.

55

56 **Keywords:** Carotid Body; Sympathetic Nervous System; Inflammation; Neuroimmune  
57 Interactions; Neuroimmunomodulation; Neural Circuits

58

59

60

61

62

63

64

65

66

67

68

69

70

71

## 72 **Introduction**

73 The existence of neuroimmune interactions and their relevance to the control of  
74 inflammation are well-established and have been extensively explored in the last 20  
75 years (Abe et al., 2017; Bassi et al., 2020; Filiano et al., 2016; Kressel et al., 2020;  
76 Lankadeva et al., 2020; Martelli et al., 2014; Mughrabi et al., 2021; Murray et al., 2021;  
77 Steinman, 2004; Tanaka et al., 2021) since the discovery of the “inflammatory reflex”  
78 (Borovikova et al., 2000). In general, there is a consensus that this reflex works as a  
79 negative-feedback mechanism that comprises: 1) a detection component, which  
80 identifies pathogen- or danger-associated molecular patterns, generating an  
81 inflammatory response; 2) an afferent arm, which conveys information about the  
82 systemic inflammatory status to the central nervous system; 3) integrative centers in  
83 the brain, that receive and process signals regarding the systemic inflammatory  
84 condition, orchestrating an appropriate counteracting response and; 4) an efferent  
85 arm, which are the effectors that exert immunomodulatory functions to promote  
86 resolution of infection and inflammation.

87 The vagus nerve is considered an important element in neuroimmune  
88 interactions (Borovikova et al., 2000; Kressel et al., 2020; Mughrabi et al., 2021). Its  
89 afferent (sensory) and efferent (motor) fibers are involved in the bidirectional  
90 communication between the nervous and the immune systems, providing a reflex  
91 mechanism known as the “cholinergic anti-inflammatory pathway” (Borovikova et al.,  
92 2000; Mughrabi et al., 2021). According this mechanism, vagal sensory neurons detect  
93 inflammatory mediators produced in conditions of systemic inflammation and send this  
94 information to the central nervous system (Watkins et al., 1995), which, in turn,  
95 generates a vagal efferent output that counteracts inflammation mainly through  
96 acetylcholine-induced inhibition of cytokine production (Borovikova et al., 2000). The  
97 importance of this cholinergic anti-inflammatory mechanism is beyond doubt since its  
98 dysfunction is involved in the pathophysiology of several conditions (Bassi et al., 2017;  
99 Chang et al., 2019; Kanashiro et al., 2017; Li et al., 2011; van Maanen et al., 2009).  
100 However, several studies have shown convincing evidence for the existence of other  
101 neural mechanisms that regulate inflammation. For instance, animal and human  
102 studies have demonstrated that the efferent sympathetic nervous system can  
103 modulate inflammatory conditions through catecholamine-mediated suppression of  
104 innate immune responses (Abe et al., 2017; Kox et al., 2014; Lankadeva et al., 2020;

105 Martelli et al., 2014; Tanaka et al., 2021; van Westerloo et al., 2011). Moreover, some  
106 studies demonstrated that the sympathetic-mediated anti-inflammatory reflexes do not  
107 depend on vagal afferent signalling, suggesting the existence of other peripheral  
108 mechanisms able to detect inflammation and communicate with the central nervous  
109 system to activate downstream sympathetic anti-inflammatory pathways (Abe et al.,  
110 2017; Martelli et al., 2014).

111 In this regard, the carotid body, classically known as the main peripheral  
112 monitor of the O<sub>2</sub> levels in the blood, has been considered a polymodal sensor due to  
113 its particular ability to detect diverse molecules present in the circulation, such as  
114 glucose, sodium chloride, hormones, and also, inflammatory mediators (Allen, 1998;  
115 da Silva et al., 2019; Jendzjowsky et al., 2018; Katayama, 2016; Kumar and  
116 Prabhakar, 2012; Thompson et al., 2016). In the context of inflammation, several  
117 pieces of evidence indicate that the carotid bodies might be involved in the intricate  
118 interplay between the immune system and the sympathetic nervous system. First, the  
119 carotid body expresses receptors for inflammatory mediators such as  
120 lysophosphatidic acid (LPA) and pro-inflammatory cytokines such as IL-1 $\beta$ , IL-6, and  
121 tumor necrosis factor-alpha (TNF- $\alpha$ ) (Fernández et al., 2008; Jendzjowsky et al., 2018;  
122 Kumar and Prabhakar, 2012; Mkrтчian et al., 2012; Wang et al., 2002). Second, LPA  
123 and pro-inflammatory cytokines stimulate the carotid body and increase the carotid  
124 sinus nerve (CSN) afferent activity in isolated *in vitro* preparations (Jendzjowsky et al.,  
125 2021, 2018). Third, carotid body stimulation by its typical stimulus (hypoxia) activates  
126 central autonomic areas that control parasympathetic (Erickson and Millhorn, 1994;  
127 Zera et al., 2019) and, also, the sympathetic nervous system (Kline et al., 2010;  
128 Koshiya and Guyenet, 1996; Luise King et al., 2012) which, besides vagally-mediated  
129 mechanisms, represents an important component in the neural regulation of immunity  
130 (Abe et al., 2017; Lankadeva et al., 2020; Martelli et al., 2014). Last, carotid body  
131 denervation worsens systemic inflammation and accelerates multiple organ  
132 dysfunction and death in rats with lipopolysaccharide (LPS)-induced sepsis (Nardocci  
133 et al., 2015), suggesting that the carotid body is a protective factor during acute  
134 inflammatory conditions. Altogether, these observations led to the hypothesis that the  
135 carotid body plays a role in neuroimmune interactions, but the exact mechanisms  
136 underlying this cross-talk are largely unknown.

137 In this study, we focused on investigating the impact of TNF- $\alpha$  (a ubiquitous  
138 cytokine that triggers inflammation)(Grieve et al., 2017) on the carotid body-mediated

139 activation of the sympathetic nervous system, as well as the relevance of this  
140 interaction in the modulation of TNF- $\alpha$ -induced systemic inflammation. We revealed  
141 that the carotid body expresses the TNF- $\alpha$  receptor type I (TNFR1) and detects  
142 increased levels of TNF- $\alpha$  in peripheral circulation, transmitting this information to the  
143 brain via CSN afferent inputs to commissural nucleus tractus solitarius (cNTS)  
144 glutamatergic neurons that project to rostral ventrolateral medulla (RVLM) pre-  
145 sympathetic neurons, resulting in activation of the sympathetic nervous system to  
146 counteract the TNF- $\alpha$ -induced inflammation. We, therefore, propose the existence of  
147 a physiological carotid body-mediated neuroimmune reflex that acutely controls  
148 inflammation. The identification of this neuroimmune reflex provides potential  
149 mechanistic insights into the pathophysiology of inflammation-mediated diseases as  
150 well as into the development of novel therapeutic strategies to treat these conditions.

151  
152  
153  
154  
155  
156  
157  
158  
159  
160  
161  
162  
163  
164  
165  
166  
167  
168  
169  
170  
171  
172

173 **Results**

174

175 **TNFR1 is expressed in the carotid body**

176 To verify the expression of TNF- $\alpha$  receptors type I (TNFR1) in the carotid body, we  
177 used a combined approach of RNAscope *in situ* hybridization and  
178 immunofluorescence. We found that the mRNA of TNFR1 is expressed in the carotid  
179 body, characterized by clusters of tyrosine hydroxylase (TH)-positive cells (glomus  
180 cells) (Fig. 1).

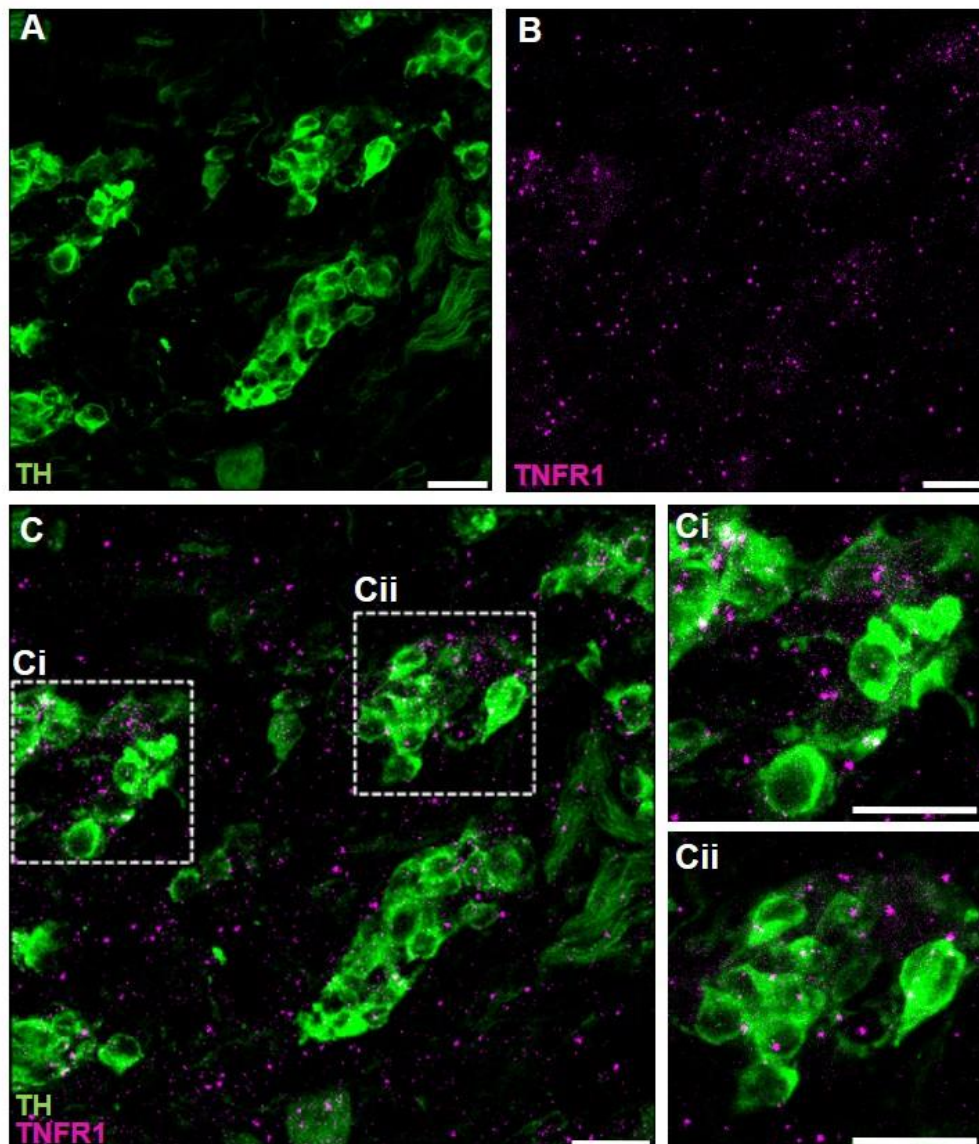

181

182 **Figure 1.** TNF- $\alpha$  receptors type I (TNFR1) are expressed in the carotid body of rats. Representative  
183 section of a rat carotid body showing combined fluorescent *in situ* hybridization (TNFR1; magenta  
184 puncta) and immunofluorescence (Tyrosine hydroxylase; TH; green staining). **A.** TH positive cells  
185 (glomus cells) in the carotid body. **B.** RNAscope *in situ* hybridization showing TNFR1 mRNA expression  
186 in the carotid body. **C.** Overlay of images a and b showing the colocalization of TH and TNFR1. **Ci** and  
187 **Cii.** Zoom into selected regions of image C. Scale bars: 20  $\mu$ m.



## 188 **Circulating TNF- $\alpha$ increases carotid sinus nerve afferent activity**

189 Next, we investigated if elevated TNF- $\alpha$  levels in the blood could activate its receptors  
190 in the carotid body and increase CSN activity in vivo. We found that exogenous TNF-  
191  $\alpha$  administration increased CSN activity by  $34 \pm 5\%$  at 30 minutes after administration  
192 compared to baseline (Figure 2B). This TNF- $\alpha$ -induced excitation of CSN was  
193 sustained and lasted the whole experiment ( $46 \pm 7\%$ ,  $55 \pm 8\%$ ,  $60 \pm 10\%$  at 60, 90,  
194 and 120 minutes after TNF- $\alpha$  administration, respectively; Figure 2B). Because  
195 throughout the experimental protocol, the animals were artificially ventilated with a  
196 slightly hyperoxia (50% O<sub>2</sub>, balance N<sub>2</sub>), it is very unlikely that the observed increase  
197 in CSN activity was due a potential TNF- $\alpha$ -induced hypoxia. Our data suggest that the  
198 carotid body could detect the circulating TNF- $\alpha$  and send signals to the central nervous  
199 system through increases in CSN activity. We, therefore, hypothesized that the central  
200 nervous system, in turn, might orchestrate complex autonomic responses, including  
201 the activation of the sympathetic nervous system.

202

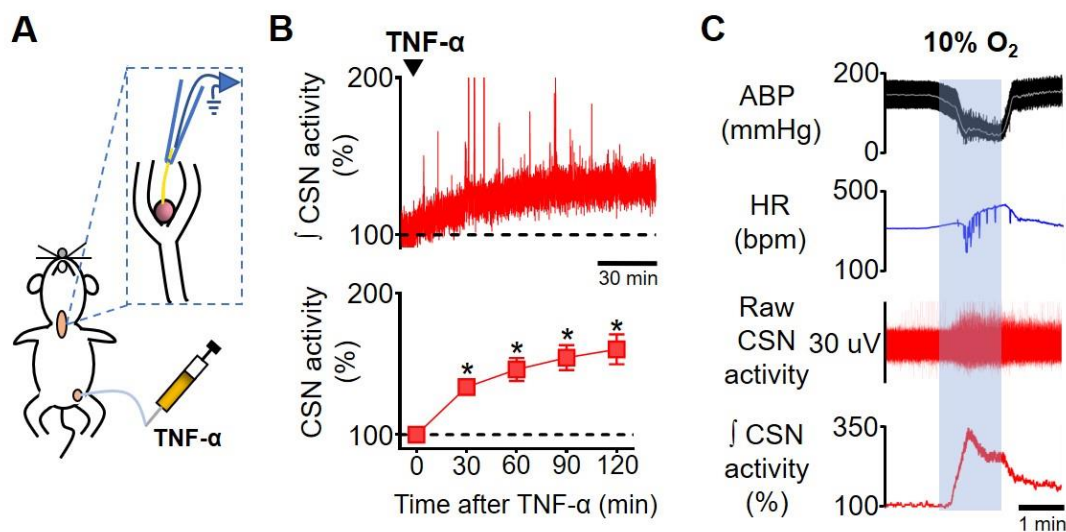

203

204 **Figure 2.** Carotid sinus nerve afferent activity (CSN activity) in response to intravenous TNF- $\alpha$ . **A.**  
205 Schematic illustration of the experimental protocol. **B.** Representative trace of the integrated CSN  
206 activity ( $\int$  CSN activity; time constant = 1 s) from one rat during baseline and after TNF- $\alpha$  (500 ng, IV,  
207 black arrowhead) administration (top; scale bar = 30 minutes) and summary data showing CSN activity  
208 at baseline and 30, 60, 90 and 120 minutes after TNF- $\alpha$  administration (bottom; n = 6). Baseline CSN  
209 activity was normalized to 100% after noise subtraction. A one-way repeated measures ANOVA  
210 detected statistically significant differences in CSN activity over time,  $F_{(4, 20)} = 21,282$ ,  $p < 0.001$ .  
211 Subsequent post hoc analysis with a Bonferroni adjustment revealed that, as compared to time 0  
212 (baseline), CSN activity was statistically significantly higher at 30 minutes (34%, 95% CI [9, 59],  $p =$   
213 0.014); at 60 minutes (46%, 95% CI [8, 85],  $p = 0.023$ ); at 90 minutes (55%, 95% CI [13, 96],  $p = 0.016$ );  
214 and at 120 minutes (60%, 95% CI [10, 111],  $p = 0.023$ ) after TNF- $\alpha$  administration. \* $p < 0.05$ . Data are  
215 means  $\pm$  SEM. **C.** Representative traces showing the viability of CSN activity recordings assessed by  
216 a brief exposure to hypoxia (10% O<sub>2</sub>, balance N<sub>2</sub>; grey shaded area). The typical acute response of  
217 urethane-anesthetized rats to hypoxia includes hypotension, bradycardia, and a robust increase in CSN  
218 activity. ABP, arterial blood pressure; HR, heart rate.

## 219 **RVLM-projecting cNTS glutamatergic neurons are activated by TNF- $\alpha$**

220 The first synapse of carotid body afferents within the central nervous system occurs in  
221 the cNTS, as extensively described in the literature (Colombari et al., 1996; Cruz et  
222 al., 2010; Kline et al., 2010; Malheiros-Lima et al., 2020). The cNTS sends excitatory  
223 glutamatergic projections to several areas, being implicated in diverse physiological  
224 functions. In the context of the carotid body-related functions, the cNTS neurons  
225 project to important autonomic areas involved in the neural control of cardiovascular  
226 and respiratory functions (Kline et al., 2010; Zera et al., 2019). For example, a previous  
227 report demonstrated direct monosynaptic projections from cNTS to RVLM, where the  
228 majority of pre-sympathetic neurons are located (Kline et al., 2010). It was also shown  
229 that most of these RVLM-projecting cNTS neurons are activated by hypoxia and  
230 constitute the major neural pathway of hypoxia-induced sympathetic activation (Kline  
231 et al., 2010; Koshiya and Guyenet, 1996). Thus, we sought to investigate if this  
232 sympathoexcitatory pathway is activated by circulating TNF- $\alpha$  since this cytokine  
233 increased the discharge of carotid body afferents, as shown in Figure 2B. Our results  
234 demonstrated massive monosynaptic projections from cNTS to RVLM (FG-labeled  
235 cells, blue staining, Figure 3C – E) in both SHAM and CB-X rats at all evaluated rostro-  
236 caudal levels: -14.40 mm to -14.64 mm (SHAM,  $42 \pm 7$  cells; CB-X,  $41 \pm 7$  cells), -  
237 14.16 mm to -14.40 mm (SHAM,  $43 \pm 8$  cells; CB-X,  $36 \pm 4$  cells), and -13.92 mm to -  
238 14.16 mm. (SHAM,  $53 \pm 6$  cells; CB-X,  $50 \pm 8$  cells). Most of these projections are  
239 excitatory (VGLuT2<sup>+</sup> cells, green staining, Figure 3C – E). Circulating TNF- $\alpha$  activated  
240 a considerable proportion of these RVLM-projecting glutamatergic cNTS neurons in  
241 SHAM rats, as indicated by c-FOS expression (red staining) in FG<sup>+</sup>/VGLuT2<sup>+</sup> cells  
242 (Figure 3C – E); Importantly, the number of activated RVLM-projecting glutamatergic  
243 cNTS neurons was dramatically reduced by carotid body ablation: -14.40 mm to -14.64  
244 mm (SHAM,  $11 \pm 1$  cells; CB-X,  $2 \pm 1$  cells), -14.16 mm to -14.40 mm (SHAM,  $17 \pm 7$   
245 cells; CB-X,  $3 \pm 1$  cells), and -13.92 mm to -14.16 mm. (SHAM,  $18 \pm 4$  cells; CB-X,  $3$   
246  $\pm 1$  cells). The efficacy of the bilateral carotid body ablation procedure was confirmed  
247 by the lack of cardiovascular responses to KCN (figure supplement 1A – B). Together  
248 with our previous findings (Figures 1 and 2), these results suggest that the carotid  
249 body detects the circulating TNF- $\alpha$  through TNFR1 and transmits this information to  
250 the central nervous system via carotid sinus nerve afferents, resulting in the activation  
251 of a sympathoexcitatory pathway.

252



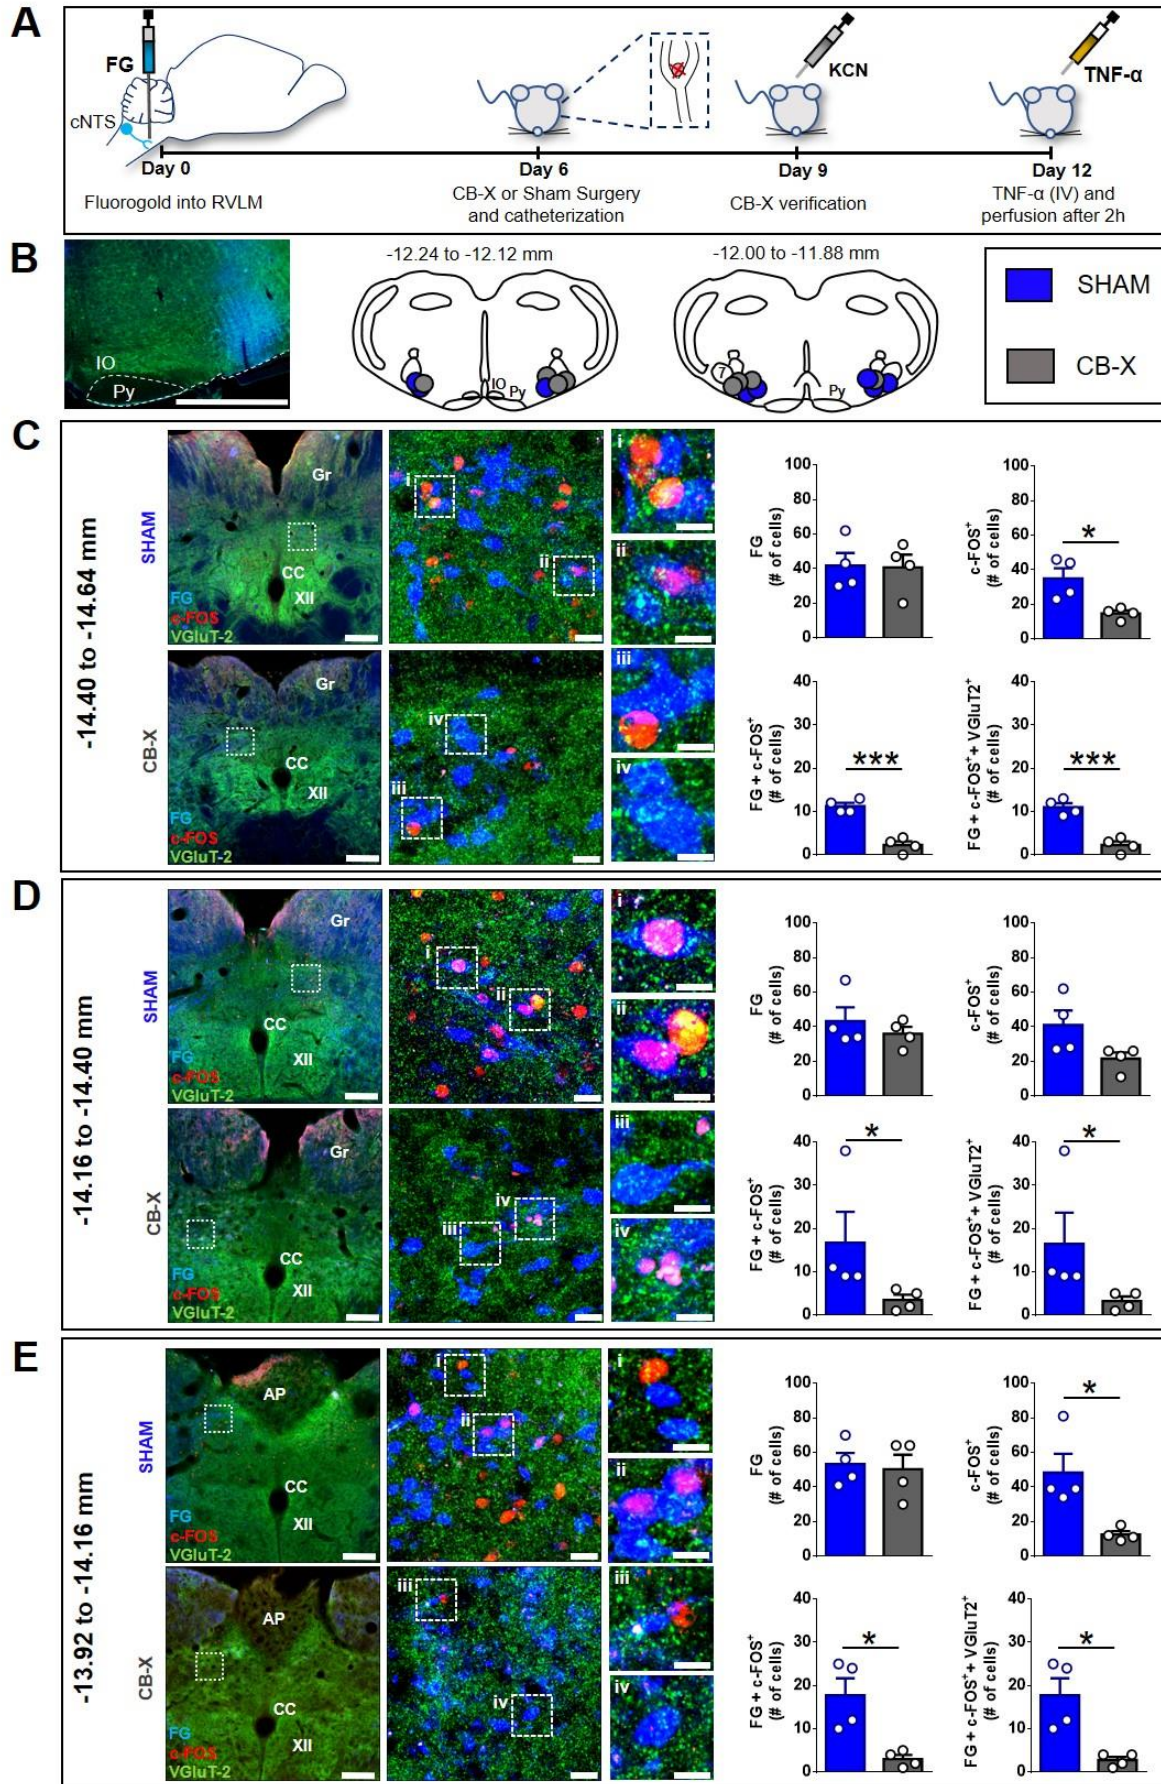

255 **Figure 3.** Activation of RVLM-projecting cNTS glutamatergic neurons by circulating TNF- $\alpha$  in SHAM  
256 and CB-X rats. **A.** Schematic illustration of the experimental protocol. **B.** Representative image from a  
257 typical retrograde tracer (Fluorogold; FG) injection-site into RVLM and schematic pictures of RVLM  
258 injections-sites of all bilaterally FG-injected animals (n=4 per group). IO, inferior olive; Py, pyramidal  
259 tract; 7, facial motor nucleus. Scale bar is 1000  $\mu$ m. **C, D** and **E.** Images are representative pictures of  
260 cNTS sections at three different rostro-caudal levels, processed for c-FOS (red) and VGluT2 (green)  
261 immunofluorescence, and containing FG-positive cells retrogradely labeled from the RVLM (blue). Gr,  
262 gracile nucleus; CC, central canal; XII, hypoglossal nucleus; AP, area postrema. Scale bars are 200  
263  $\mu$ m for 5x magnification pictures (left), 20  $\mu$ m for 40x magnification pictures (middle) and 10  $\mu$ m for  
264 zoom pictures (right). **i, ii, iii,** and **iv.** Digital zoom into selected regions. Bar graphs show the  
265 quantification of retrogradely labeled FG neurons, c-FOS<sup>+</sup> neurons, double stained (FG/c-FOS<sup>+</sup>)  
266 neurons and triple stained (FG/c-FOS<sup>+</sup>/VGluT2<sup>+</sup>) neurons in the cNTS 2 hours after TNF- $\alpha$   
267 administration (500 ng, IV) in SHAM (n=4) and CB-X (n=4) rats. The number of RVLM-projecting  
268 neurons (FG-labeled cells) was not different between SHAM and CB-X rats in all evaluated cNTS levels:  
269 -14.40 to -14.64 mm (C),  $t(6) = 0.096$ ,  $p = 0.926$  (Student's  $t$ -test); -14.16 to -14.40 mm (D),  $U = 7.5$ ,  $z$   
270  $= -0.145$ ,  $p = 0.886$  (Mann-Whitney  $U$ -test); and -13.92 to -14.16 mm (E),  $t(6) = 0.285$ ,  $p = 0.785$   
271 (Student's  $t$ -test). General neuronal activation (i.e., both RVLM-projecting and RVLM- non-projecting;  
272 c-FOS<sup>+</sup> cells) was higher in SHAM as compared to CB-X rats at -14.40 to -14.64 mm (C),  $t(3.505) =$   
273  $3.326$ ,  $p = 0.036$  (Welch's  $t$ -test) and at -13.92 to -14.16 mm (E),  $U = 0$ ,  $z = -2.323$ ,  $p = 0.029$  (Mann-  
274 Whitney  $U$ -test); but not at -14.16 to -14.40 mm (D),  $t(6) = 2.141$ ,  $p = 0.076$  (Student's  $t$ -test). The  
275 specific activation of RVLM-projecting neurons (c-FOS<sup>+</sup>/FG<sup>+</sup> cells) was higher in SHAM as compared to  
276 CB-X rats in all 3 cNTS levels: -14.40 to -14.64 mm (C),  $t(6) = 7.919$ ,  $p < 0.001$  (Student's  $t$ -test); -14.16  
277 to -14.40 mm (D),  $U = 0$ ,  $z = -2.323$ ,  $p = 0.029$  (Mann-Whitney  $U$ -test); and -13.92 to -14.16 mm (E),  
278  $t(3.324) = 3.661$ ,  $p = 0.030$  (Welch's  $t$ -test). Virtually all activated RVLM-projecting cNTS neurons are  
279 glutamatergic (FOS<sup>+</sup>/FG/VGluT2<sup>+</sup> cells). The number of activated RVLM-projecting cNTS glutamatergic  
280 neurons was higher in SHAM as compared to CB-X rats in all 3 cNTS levels: -14.40 to -14.64 mm (C),  
281  $t(6) = 7.000$ ,  $p < 0.001$  (Student's  $t$ -test); -14.16 to -14.40 mm (D),  $U = 0$ ,  $z = -2.337$ ,  $p = 0.029$  (Mann-  
282 Whitney  $U$ -test); and -13.92 to -14.16 mm (E),  $t(3.219) = 3.755$ ,  $p = 0.029$  (Welch's  $t$ -test). \* $p < 0.05$   
283 and \*\*\* $p < 0.001$ . Data are means  $\pm$  SEM.

284

285

286

287

288

289

290

291

292

293

294

295

296

297

298

299

300

301 **TNF- $\alpha$  promotes a carotid-body mediated increase in splanchnic SNA**

302 Because circulating TNF- $\alpha$  activated a well-known sympathoexcitatory central  
303 pathway, we next performed experiments to investigate the effect of this cytokine on  
304 sympathetic activity directly recorded from multiple sympathetic nerves in vivo. Our  
305 results showed that intravenously administered TNF- $\alpha$  promotes a generalized  
306 sympathoexcitation in SHAM rats (Figure 4B – F), consistent with the activation of the  
307 RVLN-projecting cNTS glutamatergic neurons demonstrated in Figure 3:  $\Delta$  Splanchnic  
308 SNA ( $14 \pm 4\%$ ,  $25 \pm 7\%$ ,  $32 \pm 9\%$  and  $42 \pm 11\%$  respectively at 30, 60, 90, and 120  
309 minutes after TNF-  $\alpha$  administration);  $\Delta$  Renal SNA ( $9 \pm 4\%$ ,  $18 \pm 6\%$ ,  $22 \pm 8\%$ ,  $27 \pm$   
310  $9\%$  respectively at 30, 60, 90, and 120 minutes after TNF-  $\alpha$  administration) and  $\Delta$   
311 lumbar SNA ( $5 \pm 1\%$ ,  $11 \pm 3\%$ ,  $16 \pm 4\%$ ,  $19 \pm 5\%$  respectively at 30, 60, 90, and 120  
312 minutes after TNF-  $\alpha$  administration). Interestingly, despite the generalized  
313 sympathetic activation, mean arterial blood pressure (ABP) only slightly increased  
314 (Figure 4B – C).

315 Since carotid body ablation almost abolished the TNF- $\alpha$ -induced activation of  
316 RLVM-projecting cNTS glutamatergic neurons (Figure 3), we tested whether the  
317 carotid bodies would be necessary to the observed sympathoexcitation in response to  
318 TNF- $\alpha$  administration. To accomplish that, we administered TNF- $\alpha$  to rats subjected to  
319 bilateral carotid body ablation (Figure 4B – F). CB-X rats displayed an attenuated  
320 increase in SNA in response to TNF- $\alpha$ :  $\Delta$  Splanchnic SNA ( $7 \pm 1\%$ ,  $8 \pm 2\%$ ,  $8 \pm 5\%$   
321 and  $8 \pm 9\%$  respectively at 30, 60, 90, and 120 minutes after TNF- $\alpha$  administration),  $\Delta$   
322 renal SNA ( $6 \pm 3\%$ ,  $6 \pm 5\%$ ,  $13 \pm 7\%$  and  $13 \pm 9\%$  respectively at 30, 60, 90, and 120  
323 minutes after TNF-  $\alpha$  administration), and  $\Delta$  lumbar SNA ( $-2 \pm 5\%$ ,  $2 \pm 7\%$ ,  $2 \pm 8\%$  and  
324  $1 \pm 8\%$  respectively at 30, 60, 90, and 120 minutes after TNF-  $\alpha$  administration). These  
325 SNA responses were diminished compared to those displayed by SHAM rats,  
326 especially on splanchnic SNA at 60, 90, and 120 minutes after TNF-  $\alpha$  administration,  
327 suggesting that the carotid bodies contribute to this specific response (Figure 4D).  
328 Unlike SHAM rats, mean ABP in CB-X rats tended to decrease even without  
329 reductions in the activity of any of the recorded sympathetic nerves (Figure 4B – C).  
330 At the end of the experiments, bilateral carotid body ablation was confirmed by the  
331 lack of sympathetic and blood pressure responses to KCN (figure supplement 2A –  
332 B).

333



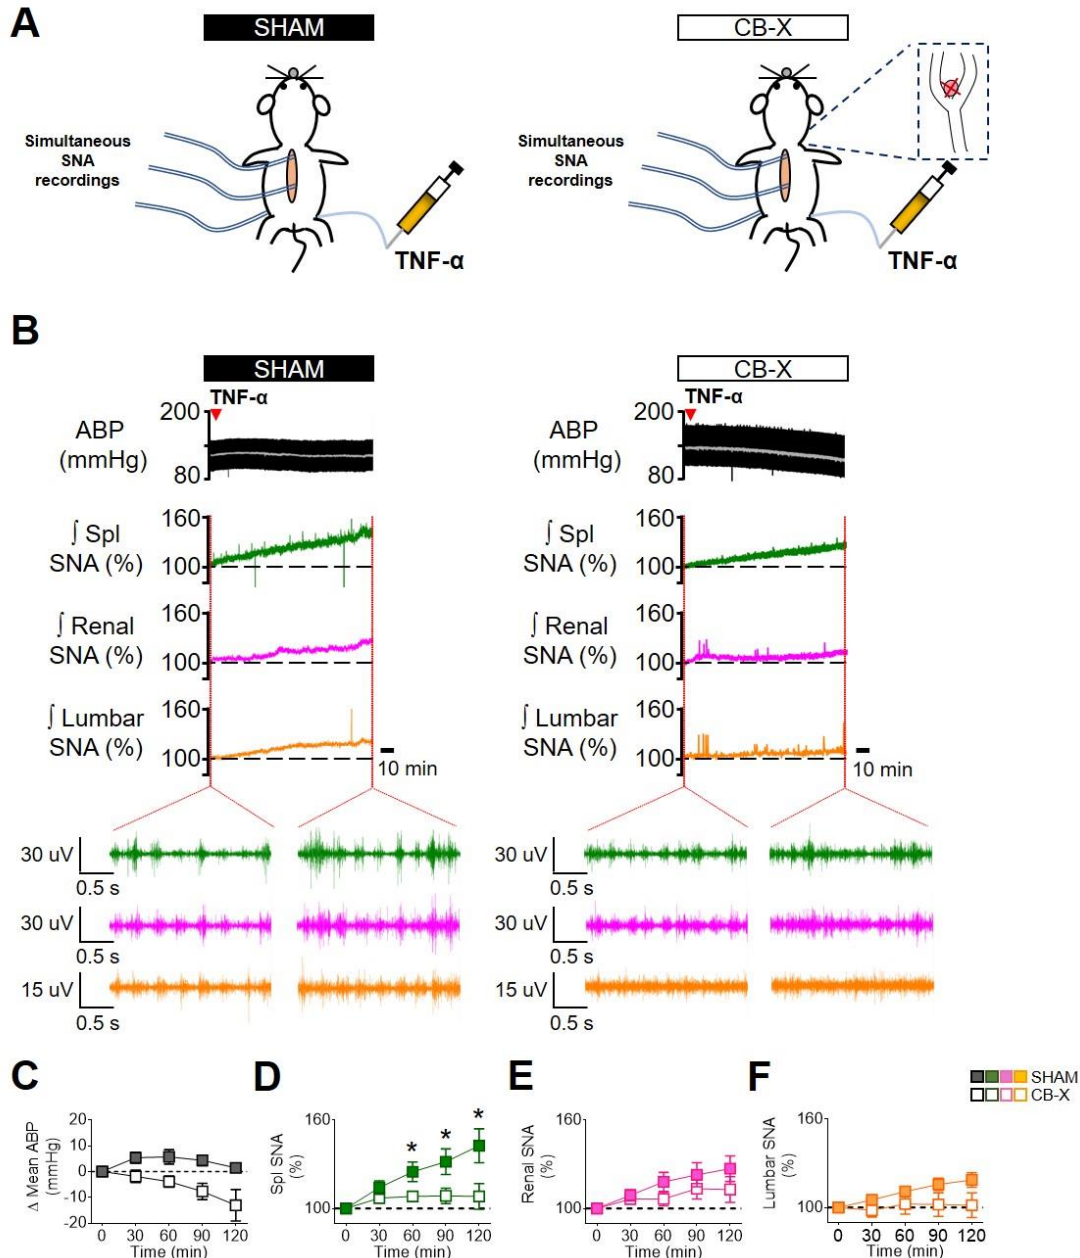

334

335 **Figure 4.** Carotid body ablation attenuates the TNF- $\alpha$ -induced splanchnic sympathetic activation. **A.**  
 336 Schematic illustration of the experimental protocol. **B.** Representative traces of arterial blood pressure  
 337 (pulsatile ABP, black; mean ABP, white), splanchnic (Spl; green), renal (magenta) and lumbar (orange)  
 338 integrated ( $\int$ ; time constant = 1s) sympathetic nerve activity (SNA) in sham-operated rats (SHAM) and  
 339 carotid body-ablated rats (CB-X) during baseline conditions and in the next 2 hours after TNF- $\alpha$   
 340 administration (500 ng, IV, red arrowhead). For each sympathetic nerve, raw SNA signals at baseline  
 341 and 2 hours after TNF- $\alpha$  administration are also presented (as indicated by the red dotted lines). **C, D,**  
 342 **E and F.** Summary data showing the changes in mean ABP (**C**), Spl SNA (**D**), Renal SNA (**E**)  
 343 and Lumbar SNA (**F**) in response to TNF- $\alpha$  in SHAM (filled symbols, n = 6) and CB-X (open symbols, n = 6)  
 344 rats. For each rat, baseline integrated SNA was normalized to 100%, and the relative changes were  
 345 calculated at four different time points (30, 60, 90 and 120 minutes after TNF- $\alpha$  administration). A  
 346 statistically significant group x time interaction on spl SNA was detected by two-way repeated-measures  
 347 ANOVA,  $F_{(3,15)} = 11.119$ ,  $p < 0.001$ . Subsequent simple main effects analyses revealed that spl SNA  
 348 changes were significantly greater in SHAM as compared to CB-X rats at 60 minutes,  $F_{(1,5)} = 7.042$ ,  $p$   
 349  $= 0.045$ ; at 90 minutes,  $F_{(1,5)} = 10.224$ ,  $p = 0.024$ ; and at 120 minutes,  $F_{(1,5)} = 16.515$ ,  $p = 0.010$  after  
 350 TNF- $\alpha$  administration. \* $p < 0.05$ . There were no statistically significant group x time interactions on  
 351 Mean ABP,  $F_{(3,15)} = 0.807$ ,  $p = 0.420$ ,  $\epsilon = 0.371$ ; Renal SNA,  $F_{(3,15)} = 0.805$ ,  $p = 0.510$ ; and Lumbar  
 352 SNA,  $F_{(3,15)} = 1.685$ ,  $p = 0.213$  (two-way repeated measures ANOVA). Data are means  $\pm$  SEM.

353 **Carotid body ablation or splanchnic sympathetic denervation exacerbates TNF-**  
354  **$\alpha$ -induced inflammation**

355 Considering that the exogenous TNF- $\alpha$  activated a carotid body-cNTS-RVLM circuitry  
356 to excite a specific sympathetic nerve (splanchnic), and because the splanchnic  
357 sympathetic nerves have been considered essential components of sympathetic-  
358 mediated mechanisms to control inflammation (Lankadeva et al., 2020; Martelli et al.,  
359 2014), we next investigated if the activation of this newly described circuit could play  
360 an anti-inflammatory role in the TNF- $\alpha$ -induced inflammation. We found that, in SHAM  
361 rats that received TNF- $\alpha$ , the plasma levels of this cytokine ( $8.5 \pm 1.3$  pg mL<sup>-1</sup>) were  
362 found significantly higher in comparison to SHAM rats that received vehicle ( $1.1 \pm 0.2$   
363 pg mL<sup>-1</sup>) (Figure 5B). It is important to mention that, the half-life of TNF- $\alpha$  is very short  
364 (few minutes) (Ma et al., 2015; Simó et al., 2012), and, hence, it is very likely that the  
365 measured levels of this cytokine in the plasma (2 hours after TNF- $\alpha$  or vehicle  
366 administrations) reflect endogenously produced TNF- $\alpha$ . In rats subjected to either  
367 carotid body ablation (CB-X) or splanchnic sympathetic denervation (SPL-X), the  
368 administration of TNF- $\alpha$  resulted in significant higher plasma levels of this cytokine  
369 compared to SHAM rats injected with TNF- $\alpha$  (CB-X + TNF- $\alpha$  =  $58.1 \pm 4.7$  pg mL<sup>-1</sup>,  
370 SPL-X + TNF- $\alpha$  =  $54.8 \pm 11.8$  pg mL<sup>-1</sup>) (Figure 5B), suggesting that the absence of the  
371 carotid bodies or the splanchnic sympathetic nerves exacerbated the systemic  
372 inflammatory status triggered by the exogenous TNF- $\alpha$ . In the same direction, the  
373 levels of TNF- $\alpha$  in the spleen were found higher in CB-X + TNF- $\alpha$  ( $4.5 \pm 0.6$  pg mg<sup>-1</sup>)  
374 and in SPL-X + TNF- $\alpha$  ( $5.1 \pm 0.8$  pg mg<sup>-1</sup>) groups compared to SHAM + TNF- $\alpha$  ( $1.7 \pm$   
375  $0.2$  pg mg<sup>-1</sup>) group (Figure 5E). These results support the idea that the exogenously  
376 administered TNF- $\alpha$  induced the endogenous production of additional TNF- $\alpha$  likely via  
377 stimulation of splenic macrophages and, that, the removal of the carotid bodies (a  
378 potential sensor of TNF- $\alpha$ ) or of the splanchnic sympathetic nerves (a potential  
379 suppressor of spleen-derived TNF- $\alpha$  production), significantly increased TNF- $\alpha$  levels  
380 in the spleen. It is important to highlight that in SPL-X + vehicle animals, the levels of  
381 TNF- $\alpha$  in the spleen were also elevated ( $6.0 \pm 1.3$  pg mg<sup>-1</sup>) (Figure 5E), reinforcing the  
382 notion that the splanchnic sympathetic innervation of the spleen (via celiac ganglion),  
383 exerts a kind of inhibitory tonus over splenic production of TNF- $\alpha$ . By way of  
384 comparison, in rats with intact splanchnic nerves (SHAM and CB-X) injected with  
385 vehicle, the levels of TNF- $\alpha$  in the spleen were low: (SHAM + vehicle =  $1.0 \pm 0.1$  pg  
386 mg<sup>-1</sup>, CB-X + vehicle =  $1.2 \pm 0.1$  pg mg<sup>-1</sup>) (Figure 5E).



387           Regarding plasma IL-6 levels, CB-X + TNF- $\alpha$  animals displayed higher levels  
388 (142.2  $\pm$  51.0 pg mL<sup>-1</sup>) than SHAM + vehicle (9.1  $\pm$  1.6 pg mL<sup>-1</sup>) and CB-X + vehicle  
389 (8.2  $\pm$  3.8 pg mL<sup>-1</sup>) (Figure 5C). Although not statistically significant, the levels of IL-6  
390 in the plasma tended to be higher in CB-X + TNF- $\alpha$  and SPL-X + TNF- $\alpha$  (38.1  $\pm$  11.2  
391 pg mL<sup>-1</sup>) compared to all other groups: (SHAM + vehicle = 9.1  $\pm$  1.6 pg mL<sup>-1</sup>, SHAM +  
392 TNF-  $\alpha$  = 14.1  $\pm$  5.0 pg mL<sup>-1</sup>, CB-X + vehicle = 8.2  $\pm$  3.8 pg mL<sup>-1</sup>, SPL-X + vehicle =  
393 2.2  $\pm$  1.9 pg mL<sup>-1</sup>) (Figure 5C). Concerning the spleen levels of IL-6, no interactions  
394 between group x treatment were detected by two-way ANOVA. However, a statistically  
395 main effect of group indicated that the spleen levels of IL-6 were higher in SPL-X +  
396 vehicle (21.7  $\pm$  4.0 pg mg<sup>-1</sup>) and SPL-X + TNF- $\alpha$  (22.0  $\pm$  4.7 pg mg<sup>-1</sup>) groups compared  
397 to SHAM + vehicle (11.2  $\pm$  1.5 pg mg<sup>-1</sup>) and SHAM + TNF- $\alpha$  (10.6  $\pm$  1.3 pg mg<sup>-1</sup>)  
398 groups (Figure 5F), suggesting that splanchnic sympathetic denervation was  
399 permissive to IL-6 production in the spleen, even in the absence of the TNF- $\alpha$  stimulus.  
400 With regard to plasma IL-10, the levels of this anti-inflammatory cytokine tended to be  
401 higher in CB-X + TNF- $\alpha$  (44.7  $\pm$  11.4 pg mL<sup>-1</sup>) and SPL-X + TNF- $\alpha$  (21.7  $\pm$  8.6 pg mL<sup>-1</sup>)  
402 <sup>1</sup>) as compared to SHAM + TNF- $\alpha$  (7.1  $\pm$  4.2 pg mL<sup>-1</sup>) and to every other group that  
403 received vehicle (SHAM + vehicle = 5.6  $\pm$  1.4 pg mL<sup>-1</sup>, CB-X + vehicle = 1.7  $\pm$  0.3 pg  
404 mL<sup>-1</sup>, SPL-X + vehicle = 2.8  $\pm$  0.5 pg mL<sup>-1</sup>) (Figure 5D). These results match with the  
405 increased levels of TNF- $\alpha$  in the plasma and the spleen of CB-X and SPL-X rats that  
406 received TNF- $\alpha$ , indicating a worse systemic inflammatory status in these animals.  
407 Finally, spleen levels of IL-10 tended to be lower in both CB-X groups, but was only  
408 statistically different between: CB-X + vehicle (1.7  $\pm$  0.2 pg mg<sup>-1</sup>) compared to SPL-X  
409 + vehicle (4.7  $\pm$  0.3 pg mg<sup>-1</sup>); CB-X + vehicle group compared to SPL-X + TNF- $\alpha$  (4.6  
410  $\pm$  0.9 pg mg<sup>-1</sup>); and between CB-X + TNF- $\alpha$  (2.3  $\pm$  0.2 pg mg<sup>-1</sup>) compared to SPL-X +  
411 vehicle (Figure 5G). In regard to norepinephrine levels in the spleen, SHAM rats  
412 injected with TNF- $\alpha$  displayed the highest mean levels (656.2  $\pm$  77.6 pg mg<sup>-1</sup>), followed  
413 by CB-X + TNF- $\alpha$  (462.3  $\pm$  36.4 pg mg<sup>-1</sup>), SHAM + vehicle (322.9  $\pm$  64.4 pg mg<sup>-1</sup>), CB-  
414 X+ vehicle (249.9  $\pm$  40.9 pg mg<sup>-1</sup>), SPL-X + TNF- $\alpha$  (20.6  $\pm$  10.7 pg mg<sup>-1</sup>), and SPL-X  
415 + vehicle (10.3  $\pm$  3.5 pg mg<sup>-1</sup>) groups (Figure 5H). Note that splanchnic sympathetic  
416 denervation almost depleted the norepinephrine content in the spleen, confirming the  
417 efficacy of the denervation procedure. In addition, the efficacy of splanchnic  
418 sympathetic denervation was also verified by the less pronounced TH staining in the  
419 spleen (figure supplement 3C). The efficacy of the bilateral carotid body ablation  
420 procedure was confirmed by the lack of cardiovascular responses to KCN (figure

421 supplement 3A – B). Collectively, our data suggest that elevated circulating levels of  
422 TNF- $\alpha$  activates a neural mechanism (carotid body-cNTS-RVLM-splanchnic  
423 sympathetic nerves) that controls the ongoing inflammation by inhibiting the synthesis  
424 of additional TNF- $\alpha$  in the spleen likely via direct norepinephrine-mediated  
425 suppression of splenic macrophage TNF- $\alpha$  production.

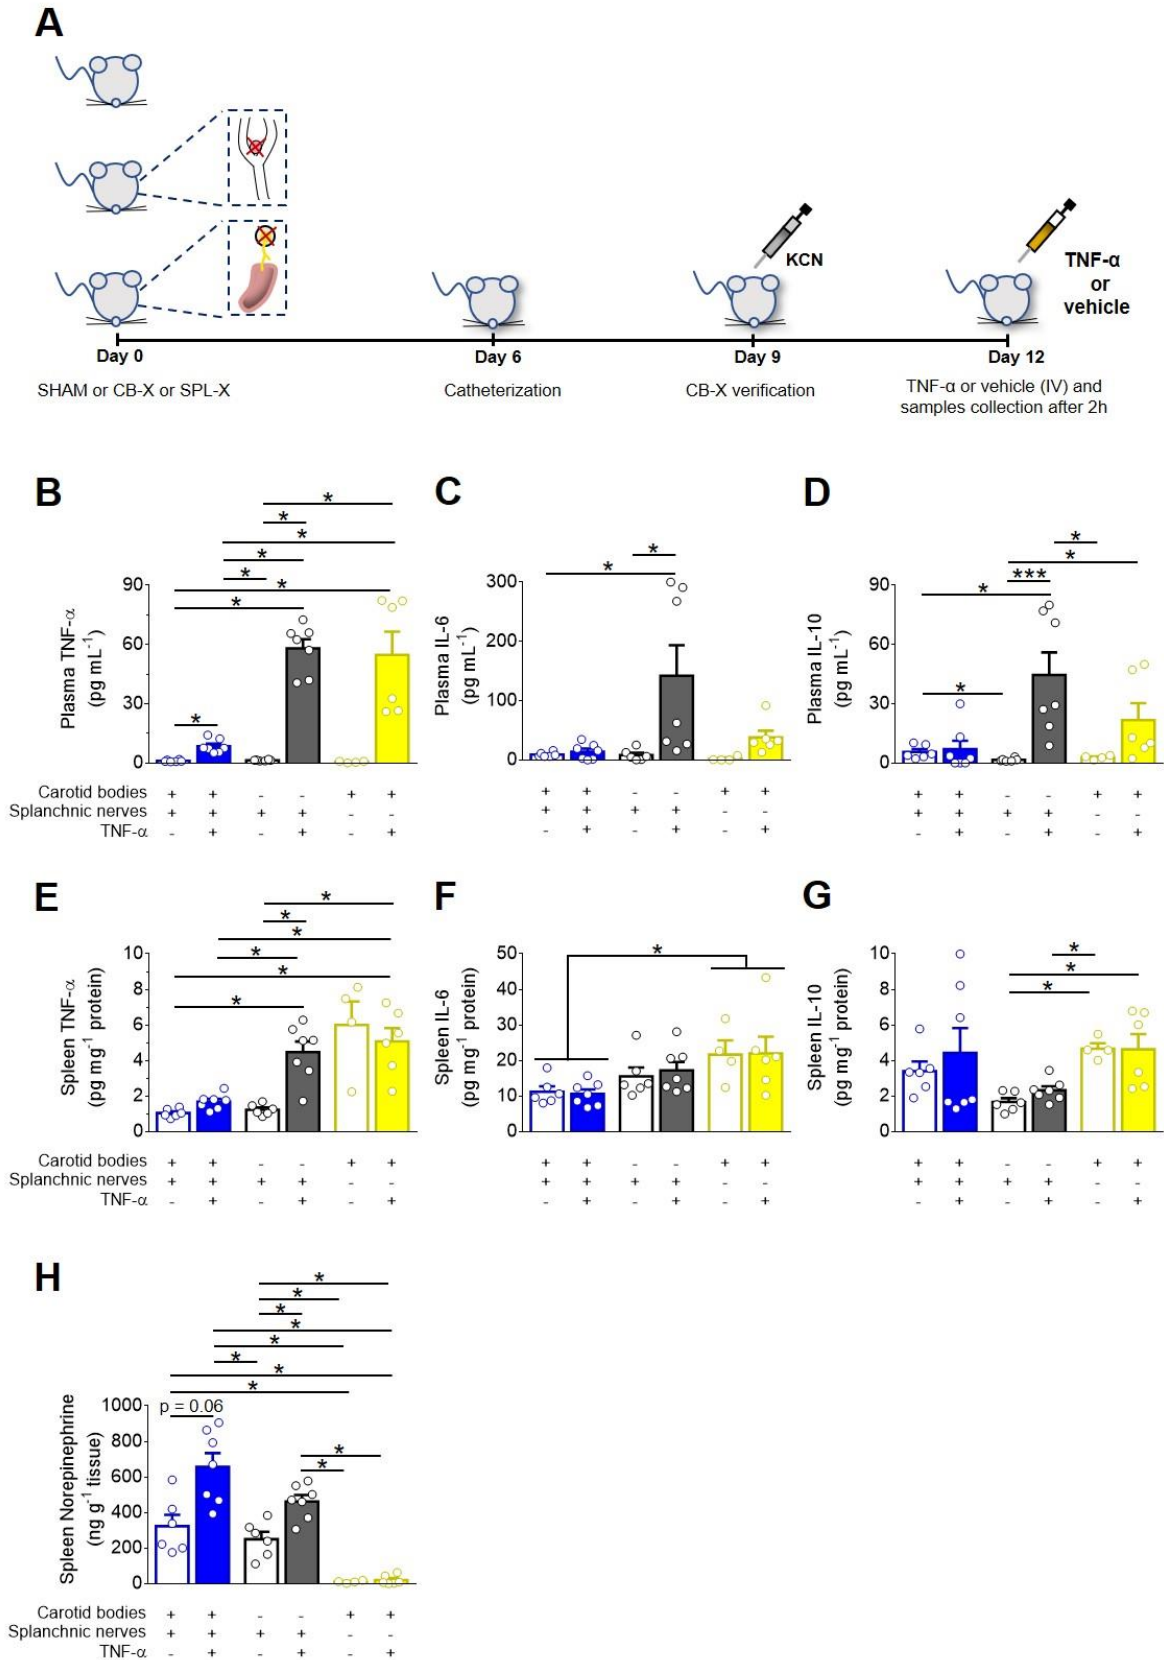

426

427 **Figure 5.** Carotid body ablation (CB-X) or splanchnic sympathetic denervation (SPL-X) intensify the  
 428 TNF- $\alpha$ -induced inflammation. **A.** Schematic illustration of the experimental protocol. **B, C and D.**  
 429 Plasma levels of TNF- $\alpha$ , IL-6 and IL-10 in SHAM (blue bars), CB-X (gray bars), and SPL-X (yellow bars)  
 430 rats, measured 2 hours after vehicle (empty bars) or TNF- $\alpha$  (filled bars) intravenous administration (n =  
 431 4 - 7 per group). **B.** Statistically significant differences in the plasma levels of TNF- $\alpha$  across groups were

432 detected:  $H(5) = 31.454$ ,  $p < 0.001$  (Kruskal-Wallis). In SHAM + TNF- $\alpha$ , the plasma levels of this cytokine  
433 were found significantly higher in comparison to SHAM + vehicle ( $U = 0$ ,  $z = -3.000$ ,  $p = 0.001$ , Mann-  
434 Whitney  $U$ -test). In CB-X and SPL-X rats, TNF- $\alpha$  administration resulted in significant higher plasma  
435 levels of this cytokine as compared to SHAM + TNF- $\alpha$ : SHAM + TNF- $\alpha$  vs. CB-X + TNF- $\alpha$  ( $U = 0$ ,  $z = -$   
436  $3.130$ ,  $p = 0.001$ , Mann-Whitney  $U$ -test); SHAM + TNF- $\alpha$  vs. SPL-X + TNF- $\alpha$  ( $U = 0$ ,  $z = -3.000$ ,  $p =$   
437  $0.001$ , Mann-Whitney  $U$ -test). Between vehicle-treated groups, the plasma levels of TNF- $\alpha$  were not  
438 different ( $p > 0.003$ ). Regarding plasma IL-6 levels, significant differences between groups were  
439 detected:  $H(5) = 22.024$ ,  $p = 0.001$  (Kruskal-Wallis). **C.** The plasma levels of IL-6 were higher in CB-X  
440 + TNF- $\alpha$  as compared to SHAM + vehicle ( $U = 1$ ,  $z = -2.857$ ,  $p = 0.002$ , Mann-Whitney  $U$ -test) and to  
441 CB-X + vehicle ( $U = 1$ ,  $z = -2.857$ ,  $p = 0.002$ , Mann-Whitney  $U$ -test). No statistical differences were  
442 found in plasma levels of IL-6 in the other pairwise comparisons ( $p > 0.003$ ). **D.** Finally, the plasma  
443 levels of IL-10 were found significantly different across groups:  $F_{(5, 13.522)} = 14.524$ ,  $p < 0.001$  (Welch  
444 ANOVA). Games-Howell post hoc test revealed that the plasma levels of IL-10 were significantly higher  
445 in CB-X + TNF- $\alpha$  as compared to all groups that received vehicle: CB-X + TNF- $\alpha$  vs. SHAM + vehicle  
446 (Mean difference =  $2.0 \text{ pg mL}^{-1}$ , 95% CI [0.6, 3.3],  $p = 0.005$ ); CB-X + TNF- $\alpha$  vs. CB-X + vehicle (Mean  
447 difference =  $3.1 \text{ pg mL}^{-1}$ , 95% CI [1.8, 4.4],  $p < 0.001$ ); CB-X + TNF- $\alpha$  vs. SPL-X + vehicle (Mean  
448 difference =  $2.6 \text{ pg mL}^{-1}$ , 95% CI [1.2, 3.9],  $p = 0.001$ ). In SPL-X + TNF- $\alpha$ , the plasma levels of IL-10  
449 were higher as compared to CB-X + vehicle (Mean difference =  $2.2 \text{ pg mL}^{-1}$ , 95% CI [0.2, 4.1],  $p =$   
450  $0.032$ ). Between vehicle-administered groups, SHAM rats displayed higher plasma levels of IL10 as  
451 compared to CB-X rats (Mean difference =  $1.2 \text{ pg mL}^{-1}$ , 95% CI [0.1, 2.2],  $p = 0.033$ ). **E, F and G.** Spleen  
452 levels of TNF- $\alpha$ , IL-6 and IL-10 in SHAM (blue bars), CB-X (gray bars), and SPL-X (yellow bars) rats, 2  
453 hours after vehicle (empty bars) or TNF- $\alpha$  (filled bars) intravenous administration ( $n = 4 - 7$  per group).  
454 **E.** Statistically significant differences in the spleen levels of TNF- $\alpha$  between groups were found:  $F_{(5,$   
455  $12.262)} = 12.957$ ,  $p < 0.001$  (Welch ANOVA). Games-Howell post hoc test revealed that the spleen levels  
456 of TNF- $\alpha$  were significantly higher in CB-X and SPL-X that received TNF- $\alpha$  as compared to SHAM rats  
457 that received TNF- $\alpha$ : CB-X + TNF- $\alpha$  vs. SHAM + TNF- $\alpha$  (Mean difference =  $2.8 \text{ pg mg}^{-1}$  protein, 95%  
458 CI [0.5, 5.1],  $p = 0.021$ ); SPL-X + TNF- $\alpha$  vs. SHAM + TNF- $\alpha$  (Mean difference =  $3.4 \text{ pg mg}^{-1}$  protein,  
459 95% CI [0.2, 6.6],  $p = 0.039$ ). Within vehicle-treated groups, the spleen levels of TNF- $\alpha$  were not different  
460 ( $p > 0.05$ ). No statistical differences were found when comparing SHAM + vehicle vs. SHAM + TNF- $\alpha$   
461 (Mean difference =  $-0.6 \text{ pg mg}^{-1}$  protein, 95% CI [-1.3, 0.0],  $p = 0.064$ ). **F.** Regarding the spleen levels  
462 of IL-6, no interactions between group x treatment were detected:  $F_{(2,30)} = 0.092$ ,  $p = 0.912$ , partial  $\eta^2 =$   
463  $0.006$ . However, a statistically significant main effect of group was found:  $F_{(2,30)} = 7.130$ ,  $p = 0.003$ ,  
464 partial  $\eta^2 = 0.322$ . A Bonferroni post hoc analysis indicated that the spleen levels of IL-6 were significant  
465 higher in SPL-X groups as compared to SHAM groups: (Mean difference =  $10.9 \text{ pg mg protein}$ , 95% CI  
466 [3.5, 18.3],  $p = 0.002$ ). **G.** Concerning the spleen levels of IL-10, statistically significant differences  
467 between groups were found:  $F_{(5, 13.792)} = 12.491$ ,  $p < 0.001$  (Welch ANOVA). Games-Howell post hoc  
468 test revealed that the spleen levels of IL-10 were significantly lower in CB-X groups as compared to  
469 SPL-X groups: CB-X + vehicle vs. SPL-X + vehicle (Mean difference =  $-1.1 \text{ pg mg}^{-1}$  protein, 95% CI [-  
470  $1.6, -0.5$ ],  $p = 0.002$ ); CB-X + vehicle vs. SPL-X + TNF- $\alpha$  (Mean difference =  $-1.0 \text{ pg mg}^{-1}$  protein, 95%  
471 CI [-1.8, -0.1],  $p = 0.026$ ); CB-X + TNF- $\alpha$  vs. SPL-X + vehicle (Mean difference =  $-0.7 \text{ pg mg}^{-1}$  protein,  
472 95% CI [-1.1, -0.3],  $p = 0.002$ ). **H.** Spleen levels of norepinephrine in SHAM (blue bars), CB-X (gray  
473 bars), and SPL-X (yellow bars) rats, 2 hours after vehicle (empty bars) or TNF- $\alpha$  (filled bars) intravenous  
474 administration ( $n = 4 - 7$  per group).. Statistically significant differences in the spleen levels of  
475 norepinephrine between groups were found:  $F_{(5, 13.050)} = 45.864$ ,  $p < 0.001$  (Welch ANOVA). \* $p < 0.05$   
476 and \*\*\* $p < 0.001$ . Data are means  $\pm$  SEM. Games-Howell post hoc test revealed that the administration  
477 of TNF- $\alpha$  in SHAM rats, resulted in a trend to increase the spleen norepinephrine levels compared to  
478 SHAM animals receiving vehicle (Mean difference =  $333.3 \text{ pg mg}^{-1}$  tissue, 95% CI [-11.2, 677.8],  $p =$   
479  $0.060$ ) and in significant increases as compared to CB-X + vehicle (Mean difference =  $406.3 \text{ pg mg}^{-1}$   
480 tissue, 95% CI [94.4, 718.2],  $p = 0.011$ ), to SPL-X + vehicle (Mean difference =  $645.9 \text{ pg mg}^{-1}$  tissue,  
481 95% CI [337.1, 954.7],  $p = 0.001$ ), and to SPL-X + TNF- $\alpha$  (Mean difference =  $635.5 \text{ pg mg}^{-1}$  tissue, 95%  
482 CI [327.6, 943.5],  $p = 0.001$ ). In CB-X rats, TNF- $\alpha$  administration led to higher levels of norepinephrine  
483 in the spleen as compared to CB-X + vehicle (Mean difference =  $212.4 \text{ pg mg}^{-1}$  tissue, 95% CI [24.4,  
484  $400.4$ ],  $p = 0.025$ ), to SPL-X + vehicle (Mean difference =  $452.0 \text{ pg mg}^{-1}$  tissue, 95% CI [307.5, 596.6],  
485  $p < 0.001$ ), and to SPL-X + TNF- $\alpha$  (Mean difference =  $441.7 \text{ pg mg}^{-1}$  tissue, 95% CI [298.1, 585.3],  $p <$   
486  $0.001$ ). SPL-X + vehicle animals also displayed lower levels of norepinephrine in the spleen compared  
487 to SHAM + vehicle (Mean difference =  $-312.6 \text{ pg mg}^{-1}$  tissue, 95% CI [-587.0, -38.1],  $p = 0.030$ ) and  
488 CB-X + vehicle (Mean difference =  $-239.6 \text{ pg mg}^{-1}$  tissue, 95% CI [-413.5, -65.7],  $p = 0.013$ ). Similarly,  
489 the levels of norepinephrine in the spleen were also lower in SPL-X + TNF- $\alpha$  compared to SHAM +  
490 vehicle (Mean difference =  $-302.2 \text{ pg mg}^{-1}$  tissue, 95% CI [-574.7, -29.8],  $p = 0.033$ ) and CB-X + vehicle  
491 (Mean difference =  $-229.3 \text{ pg mg}^{-1}$  tissue, 95% CI [-400.7, -57.9],  $p = 0.014$ ).

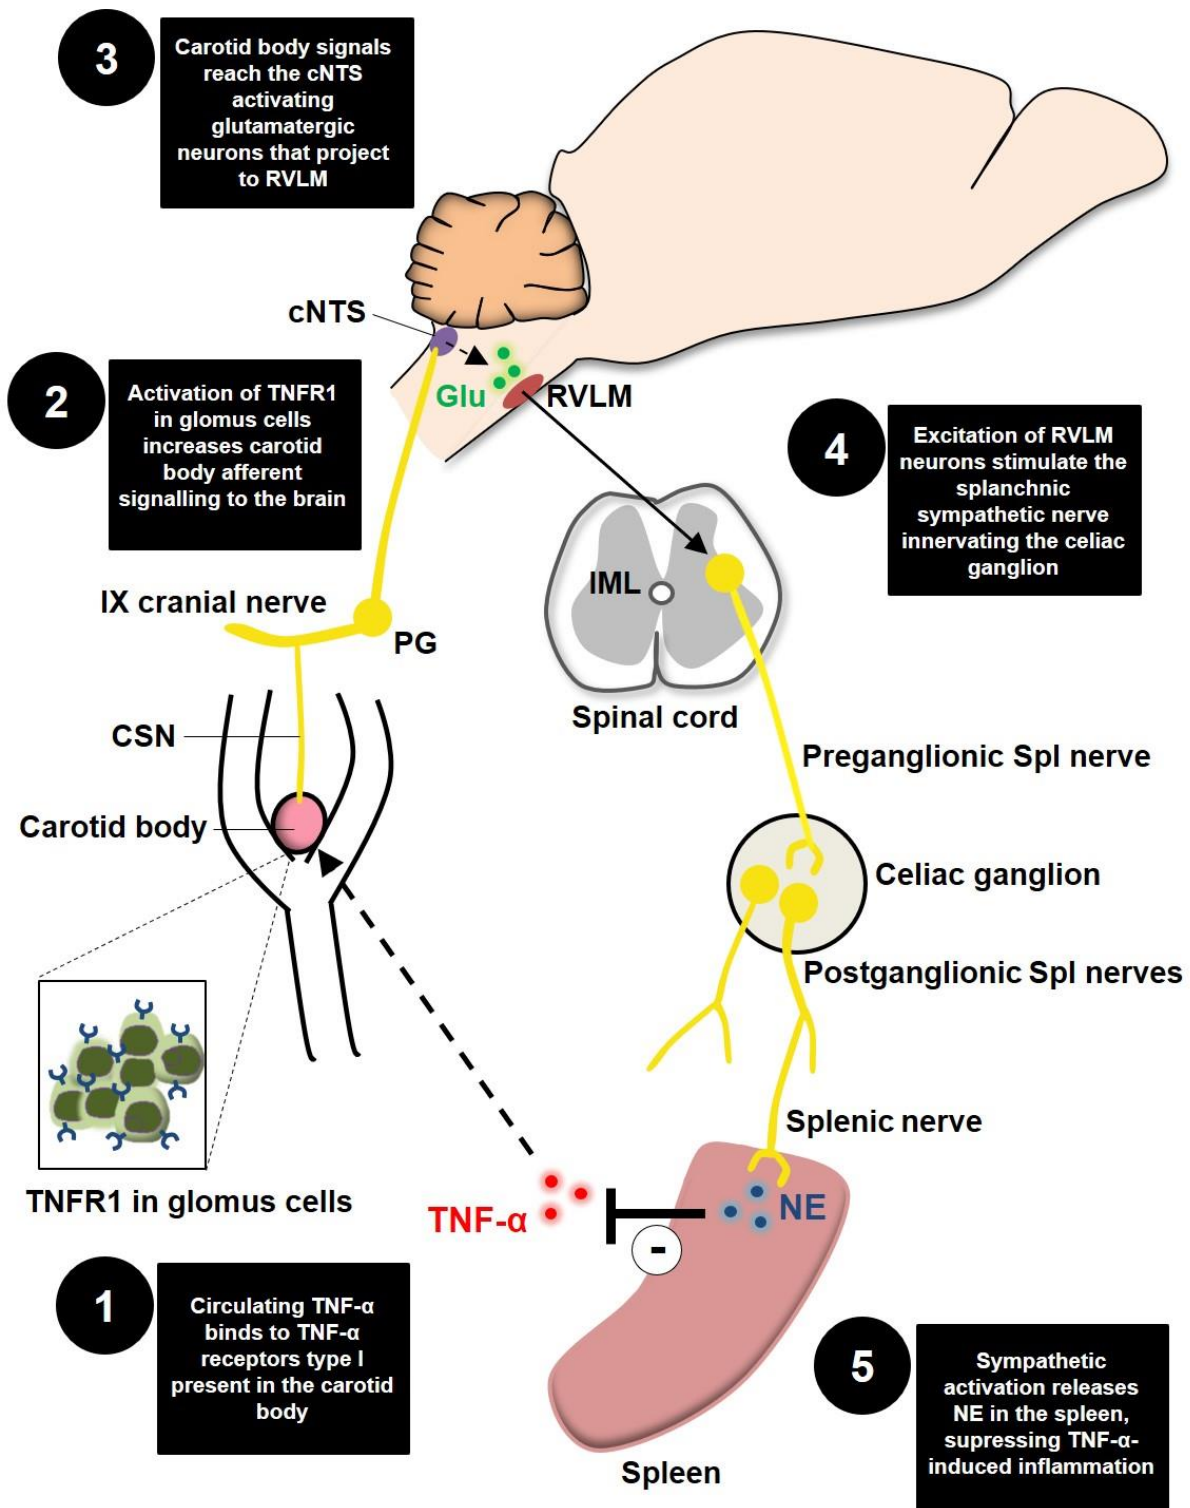

492  
493  
494  
495  
496  
497  
498  
499  
500

**Figure 6.** Schematic model of the novel proposed neuroimmune mechanism. TNFR1, TNF- $\alpha$  receptors type I; CSN, carotid sinus nerve; IX cranial nerve, glossopharyngeal nerve; PG, petrosal ganglion; cNTS, commissural nucleus tractus solitarius; Glu, glutamate; RLVM, rostral ventrolateral medulla; IML, intermediolateral nucleus; Spl, splanchnic; NE, norepinephrine.



## 501 Discussion

502 In the present study, we provide a series of anatomical and functional evidence for the  
503 existence of a previously unrecognized mechanism of neuroimmune interaction. The  
504 main finding is that the carotid body is able to detect elevated levels of the pro-  
505 inflammatory cytokine TNF- $\alpha$  in the blood and communicate with the central nervous  
506 system via carotid sinus nerve afferents, activating RVLM-projecting cNTS excitatory  
507 neurons that contribute to a counteracting sympathetic-mediated anti-inflammatory  
508 response. These results advance our understanding of the complex mechanisms  
509 underlying the bidirectional connection between the nervous and the immune systems.

510 Recently, the carotid bodies emerged as potential candidates for peripheral  
511 detectors of inflammation. This possibility is supported by a growing number of studies  
512 indicating that they are polymodal sensors, able to monitor the chemical composition  
513 of the arterial blood. More specifically, these studies have shown that besides  
514 promoting autonomic and respiratory adjustments in response to arterial hypoxemia  
515 (i.e., peripheral chemoreflex), the carotid bodies can respond to several other  
516 circulating stimuli such as leptin, angiotensin II, glucose, sodium chloride, insulin,  
517 adrenaline, and, also, inflammatory mediators (Allen, 1998; da Silva et al., 2019;  
518 Jendzjowsky et al., 2021, 2018; Katayama, 2016; Kumar and Prabhakar, 2012; Shin  
519 et al., 2019; Thompson et al., 2016). Regarding inflammatory mediators, studies  
520 reported that the carotid body of many species, including rats, cats and humans,  
521 expresses receptors for lysophosphatidic acid (LPA), IL-1 $\beta$ , IL-6, and TNF- $\alpha$   
522 (Fernández et al., 2008; Jendzjowsky et al., 2018; Mkrtchian et al., 2012; Wang et al.,  
523 2002). Accordingly, in the present study, we employed a combination of  
524 immunofluorescence and RNAscope fluorescent *in situ* hybridization that enabled the  
525 detection and precise localization of TNFR1 mRNA molecules in the carotid body of  
526 rats. Moreover, in addition to the anatomical evidence, previous functional studies  
527 demonstrated that inflammation-related factors can impact carotid body activity  
528 (Jendzjowsky et al., 2021, 2018; Shu et al., 2007), opening a wide range of possibilities  
529 regarding the role of the carotid body in the context of neuroimmune interactions. For  
530 instance, a recent study showed that LPA potently increased CSN activity in an  
531 isolated perfused carotid body/carotid sinus nerve preparation (Jendzjowsky et al.,  
532 2018). Furthermore, the same research group showed that the perfusion of the  
533 isolated carotid body/carotid sinus nerve preparation with diverse pro-inflammatory

534 cytokines (IL-4, IL-5, IL-13, IL-1, IL-6, and TNF- $\alpha$ ), one at a time or in combination,  
535 also increased CSN activity (Jendzjowsky et al., 2021), confirming the unique ability  
536 of the carotid body to sense and respond to inflammatory mediators. In our study, CSN  
537 activity was recorded in vivo and TNF- $\alpha$  was given systemically (IV). We chose the IV  
538 administration route because it better mimics a real scenario of systemic inflammation.  
539 We observed a progressive and significant increase in CSN activity, indicating that the  
540 carotid body could detect the elevated levels of TNF- $\alpha$  in the blood and alert the central  
541 nervous system via afferent signals. The reasons by which TNF- $\alpha$  increased CSN  
542 activity in a sustained manner (for at least 2 hours) are not clear, especially because  
543 the half-life of TNF- $\alpha$  in the plasma is reported to be very short (few minutes) (Ma et  
544 al., 2015; Simó et al., 2012). We hypothesize that the exogenous administered TNF-  
545  $\alpha$  stimulated the synthesis and release of additional TNF- $\alpha$ , probably via direct  
546 activation of splenic macrophages as suggested by our data (Figure 5) and/or by  
547 indirect activation of liver Kupffer cells as observed during endotoxemia in rats  
548 (Fonseca et al., 2021). This endogenously produced TNF- $\alpha$  could either sustain the  
549 carotid body activation and, also, stimulate the synthesis of further TNF- $\alpha$ .

550 We found that besides increasing CSN activity, the intravenous administration  
551 of TNF- $\alpha$  promoted the activation of cNTS neurons, the first relay site for carotid body  
552 afferents. Notably, the systemic administration of TNF- $\alpha$  resulted in activation of the  
553 cNTS neurons at the same rostro-caudal levels reported to be activated after carotid  
554 body stimulation by hypoxia or intravenous KCN (Cruz et al., 2010; Kline et al., 2010;  
555 Malheiros-Lima et al., 2020). These cNTS neurons, activated by carotid body  
556 stimulation, project to several brain areas, including the RVLM, to control the  
557 sympathetic nervous system (Kline et al., 2010; Koshiya and Guyenet, 1996). A  
558 previous study observed that after 3 hours of hypoxia (10% O<sub>2</sub>) exposure, a high  
559 proportion of RVLM-projecting cNTS neurons were activated (Kline et al., 2010).  
560 Furthermore, the authors injected anterograde tracers into the carotid body and  
561 observed that carotid body afferents terminate in close apposition to the RVLM-  
562 projecting cNTS neurons. Thus, this neural circuitry elegantly revealed by Kline et al.  
563 (2010), along with previous data (Aicher et al., 1996; Koshiya and Guyenet, 1996),  
564 provides a major neural pathway for hypoxia-induced sympathoexcitation. Of note, the  
565 blockade of glutamatergic receptors in the NTS was shown to strongly reduce the  
566 sympathetic responses to chemical stimulation of the carotid body (Ferreira et al.,  
567 2018). Since in the present study, circulating TNF- $\alpha$  induced the activation of RLVM-

568 projecting cNTS glutamatergic neurons at the same rostro-caudal levels reported in  
569 the literature (Cruz et al., 2010; Kline et al., 2010; Malheiros-Lima et al., 2020) and,  
570 because carotid body ablation almost abolished the activation of these neurons, we  
571 believe that TNF- $\alpha$  might be stimulating a similar neural pathway (carotid body-cNTS-  
572 RVLM) activated by hypoxia to increase sympathetic activity. It is important to highlight  
573 that more than a half of c-FOS positive neurons observed in SHAM rats treated with  
574 TNF- $\alpha$  were not co-localized with FG (non-RVLM-projecting). We hypothesize that  
575 these neurons project to other nuclei involved in sympathetic modulation, such as the  
576 PVN, regions involved in respiratory control, and vagal nuclei (Luise King et al., 2012;  
577 Malheiros-Lima et al., 2020; Neff et al., 1998; Willis et al., 1996; Zera et al., 2019). In  
578 fact, recent studies suggested that inflammation-induced carotid body stimulation  
579 could also activate brainstem vagal nuclei (nucleus ambiguus and dorsal motor  
580 nucleus of the vagus) to increase parasympathetic activity (Jendzjowsky et al., 2021,  
581 2018). Therefore, the results of the present and previous studies suggest that the  
582 carotid body detects circulating inflammatory mediators and activates central  
583 autonomic areas to modulate sympathetic and/or parasympathetic functions.

584 Our study shows that the TNF- $\alpha$ -induced activation of a sympathoexcitatory  
585 circuit (carotid body-cNTS-RVLM) resulted in increased SNA as revealed by  
586 simultaneous recordings of splanchnic, renal and lumbar SNA. To the best of our  
587 knowledge, this is the first study describing the effects of circulating TNF- $\alpha$ , an  
588 important inflammatory mediator, on the activity of three different sympathetic nerves  
589 recorded simultaneously in vivo. Previous studies have already demonstrated that  
590 circulating TNF- $\alpha$  increases renal SNA in rats (Wei et al., 2013; Zhang et al., 2003).  
591 However, since sympathetic outflows to other tissues/organs have distinct functions  
592 and can be differentially regulated (Morrison, 2001; Tromp et al., 2018), it becomes  
593 relevant to study the effects of TNF- $\alpha$  on sympathetic outflows directed to other targets  
594 besides the kidneys. Here, we found that TNF- $\alpha$  promoted a generalized activation of  
595 the sympathetic nervous system, increasing splanchnic, renal, and lumbar SNA in  
596 carotid body-intact rats. The removal of the afferent inputs from the carotid bodies (by  
597 bilateral carotid body ablation) blunted, in part, this TNF- $\alpha$ -induced sympathetic  
598 activation, consistent with the attenuated activation of RLVM-projecting cNTS neurons  
599 observed in CB-X rats (Figure 3C – E). Interestingly, the blunting effect of carotid body  
600 ablation was significant only on splanchnic SNA. Therefore, our data indicate that  
601 increased circulating TNF- $\alpha$  activates a carotid body-cNTS-RVLM neural circuit that

602 selectively controls splanchnic SNA in this condition. It is noteworthy that a previous  
603 study reported that the increase in renal SNA following the systemic administration of  
604 TNF- $\alpha$  was largely attenuated in rats with lesions of the subfornical organ (Wei et al.,  
605 2013). It suggests that splanchnic, renal, and lumbar SNA might be under the control  
606 of different neural routes and might have different functions in the course of TNF- $\alpha$ -  
607 driven inflammation.

608 In this context, some studies have suggested that the splanchnic sympathetic  
609 nerves play an important immunomodulatory role during endotoxemia-induced  
610 systemic inflammation (Lankadeva et al., 2020; Martelli et al., 2014). For instance, it  
611 was demonstrated that acute endotoxemia induced by intravenous administration of  
612 lipopolysaccharide (LPS) significantly increased plasma levels of TNF- $\alpha$  after 90  
613 minutes in rats (Martelli et al., 2014). In parallel, this LPS administration potently  
614 increased splanchnic SNA. Notably, when LPS was given to rats subjected to the  
615 bilateral section of the splanchnic sympathetic nerves, the plasma TNF- $\alpha$  levels  
616 increased 5 times more than those of intact rats (Martelli et al., 2014). Together, these  
617 results indicate that during LPS-induced systemic inflammation, the splanchnic SNA  
618 increases to counteract the ongoing inflammation in a kind of negative feedback reflex.  
619 Since, in the present study, the elevated circulating TNF- $\alpha$  activated a carotid body-  
620 cNTS-RVLM neural circuit to increase splanchnic SNA, we hypothesized that this  
621 mechanism could be a neuroimmune reflex to counteract the TNF- $\alpha$ -induced  
622 inflammation. To test this hypothesis, we removed either the detection/afferent arm  
623 (i.e., the carotid bodies) or the efferent arm (i.e., the splanchnic sympathetic nerves)  
624 of this potential neuroimmune reflex and subjected these animals (and SHAM control  
625 animals) to systemic injections of TNF- $\alpha$  or vehicle. After 2 hours, we quantified the  
626 levels of TNF- $\alpha$ , IL-6, and IL-10 in the blood and in the spleen as well as the levels of  
627 norepinephrine in the spleen. We found that in SHAM rats, the administration of TNF-  
628  $\alpha$  significantly increased the plasma levels of TNF- $\alpha$  and slightly increased the spleen  
629 levels of TNF- $\alpha$  compared to vehicle-injected SHAM rats. In addition, TNF- $\alpha$   
630 administration tended to increase spleen norepinephrine levels in SHAM animals as  
631 compared to its vehicle-treated counterparts (Figure 5H,  $p = 0.06$ ), consistent with our  
632 data showing a TNF- $\alpha$  induced splanchnic SNA activation. Interestingly, in rats  
633 subjected to either carotid body ablation or splanchnic sympathetic denervation, the  
634 administration of TNF- $\alpha$  resulted in exacerbated levels of pro-inflammatory cytokines  
635 in the plasma and the spleen, supporting the idea that both the detection/afferent arm

636 and the efferent arm are important components of a neuroimmune regulatory  
637 mechanism that detects and modulates acute inflammation through sympathetic  
638 activation towards the spleen. Disrupting the afferent/detection component (carotid  
639 body ablation) resulted in a peculiar elevation of all quantified cytokines, including IL-  
640 10 (an anti-inflammatory cytokine). The reason for this elevation in plasma IL-10 in  
641 CB-X rats treated with TNF- $\alpha$  is not clear. This could result from the fact that carotid  
642 body ablation eliminated only part of the autonomic circuits toward the spleen, possible  
643 preserving and/or amplifying other counter-inflammatory mechanisms. In fact, the  
644 administration of TNF- $\alpha$  in CB-X rats, still activated splanchnic SNA and resulted in a  
645 significant increase in splenic levels of norepinephrine compared to vehicle-injected  
646 CB-X rats. However, the TNF- $\alpha$ -induced splanchnic SNA activation and  
647 norepinephrine release in the spleen were attenuated in CB-X rats compared to SHAM  
648 rats, which could explain, at least in part, the exacerbated inflammatory status  
649 observed in the animals lacking the carotid bodies. Differently, the interruption of the  
650 efferent component (splanchnic sympathetic denervation) completely blocked the  
651 sympathetic signalling to the spleen, removing the norepinephrine “inhibitory tonus”  
652 on cytokine production by splenic macrophages, resulting in elevated splenic cytokine  
653 levels even in those animals administered with saline. Collectively, our data suggest  
654 the existence of an intrinsic and physiological anti-inflammatory reflex that depends  
655 on a detection/afferent arm (i.e., the carotid bodies and the carotid sinus nerve), on a  
656 central integrative pathway (i.e., RVLM-projecting cNTS neurons), and on an  
657 effector/efferent arm (i.e., splanchnic sympathetic nerves) that modulates the splenic  
658 production of cytokines through norepinephrine release.

659         The findings of the present study are novel and place the carotid body as a  
660 critical player in the context of neuroimmune interactions. In the last years, the  
661 contribution of the carotid bodies to sympathetic overactivity has been implicated in  
662 the pathophysiology of several diseases such as sleep apnoea, hypertension, and  
663 heart failure (Marcus et al., 2014; McBryde et al., 2013; Melo et al., 2019; Narkiewicz  
664 et al., 2016; Niewinski et al., 2017; Yuan et al., 2016). In these conditions, exaggerated  
665 tonic CSN activity leads to chronic activation of the sympathetic nervous system, often  
666 associated with a poor prognosis. Here, we found that the acute carotid body-mediated  
667 sympathetic activation induced by intravenous TNF- $\alpha$  is likely to be beneficial because  
668 it exerted a counteracting anti-inflammatory reflex. However, it is possible that in  
669 chronic pathological inflammatory conditions, the long-term activation of this carotid



670 body-dependent neuroimmune circuit leads to side effects because it generates an  
671 aberrant tonic CSN input to central sympathetic networks, leading to sustained  
672 sympathetic overactivity to multiple target organs. This possibility raises an intriguing  
673 question on whether circulating inflammatory factors could trigger the carotid body-  
674 mediated sympathetic overactivity observed in diseases such as hypertension  
675 (McBryde et al., 2013; Narkiewicz et al., 2016) and heart failure (Marcus et al., 2014;  
676 Niewinski et al., 2017) since these conditions are associated with increased systemic  
677 inflammation (Bautista et al., 2005; Norlander et al., 2018; Rauchhaus et al., 2000;  
678 Sesso et al., 2015). On the other hand, defects in the carotid body-mediated  
679 neuroimmune reflex described here, could impair the ability to regulate the levels of  
680 inflammatory mediators in the bloodstream, amplifying systemic inflammation.  
681 Nevertheless, further investigations are needed to clarify the beneficial or detrimental  
682 effects following the activation/inactivation of the neuroimmune mechanism described  
683 in the present study under different conditions and to explore its therapeutic potential  
684 in the treatment of inflammatory diseases.

685

686

## 687 **Methods**

### 688 **Animals and ethical approval**

689 All experimental procedures were reviewed and approved by the Ethical Committee in  
690 Animal Experimentation of the Araraquara School of Dentistry, São Paulo State  
691 University (protocol nº 17/2019) and conducted following the Guide for the Care and  
692 Use of Laboratory Animals from the Brazilian National Council for Animal  
693 Experimentation Control. Experiments were performed on adult male *Holtzman* rats  
694 (320 - 400 g) obtained from the Animal Care Unit of the São Paulo State University  
695 (Araraquara, SP, Brazil). The animals were housed in collective cages (2 - 4  
696 animals/cage), provided with chow and water *ad libitum*, and maintained under  
697 controlled conditions of temperature ( $22 \pm 1^\circ\text{C}$ ), humidity (50 - 60%) in a 12:12 hours  
698 light/dark cycle.

699

700

701

702

703 **General procedures**

704 All surgical procedures were performed under aseptic conditions. The appropriate  
705 depth of anesthesia was confirmed by the absence of withdrawal reflex and corneal  
706 reflexes in response to pinching the toe. Throughout the surgical procedures and the  
707 experimental protocols performed under anesthesia (described below), the body  
708 temperature was measured by a rectal probe and maintained at  $37 \pm 0.5^{\circ}\text{C}$  with a  
709 water-circulating heating pad.

710

711

712 **Experiment 1: Expression of TNF- $\alpha$  receptor type I in carotid body glomus cells**

713 Rats were deeply anesthetized with isoflurane (5% in 100 O<sub>2</sub>) and subjected to  
714 transcatheter perfusion with cold phosphate-buffered saline (PBS, 10 mM, pH 7.4, 100  
715 mL/100 g BW) followed by paraformaldehyde (PFA, 4% in PBS, 100 mL/100 g BW).  
716 Whole carotid bifurcations containing the carotid bodies were collected as previously  
717 described (Pijacka et al., 2018) and fixed in PFA for 24 hours at 4<sup>o</sup> C. Next, carotid  
718 bifurcations were transferred to 10% sucrose solution and kept at 4<sup>o</sup> C until the tissue  
719 sinks. This procedure was repeated with 20% and 30% sucrose solutions. Carotid  
720 bifurcations were frozen in Tissue Freezing Medium (Triangle Biomedical Sciences,  
721 Durham, NC, USA) using dry ice, sectioned at 10  $\mu\text{m}$  in a cryostat and mounted on  
722 microscope slides (Superfrost Plus, Fisher Scientific, Pittsburgh, PA, USA). To  
723 evaluate the expression of TNF- $\alpha$  receptor type I in the carotid bodies, a fluorescent  
724 *in situ hybridization* assay (RNAscope, Advanced Cell Diagnostics, Newark, CA, USA)  
725 was used. The assay was performed according to the manufacturer instructions  
726 (document #323100-USM, available at [https://acdbio.com/documents/product-](https://acdbio.com/documents/product-documents)  
727 [documents](https://acdbio.com/documents/product-documents)) and the following materials were used: RNAscope Multiplex Fluorescent  
728 Detection Reagents v2 (product #323110), the kit RNAscope H<sub>2</sub>O<sub>2</sub> and Protease  
729 Reagents (product #322381), the RNAscope probe for TNF- $\alpha$  receptor type I (product  
730 #408111) and the TSA Cyanine 3 Plus Evaluation kit (product #NEL744001KT, Akoya  
731 Biosciences, Boston, MA, USA). After completing the fluorescent *in situ hybridization*  
732 protocol, an immunofluorescence protocol for tyrosine hydroxylase (TH) was  
733 performed to identify carotid body glomus cells. First, the slides were incubated in a  
734 blocking solution (0.1 M PBS, 10% normal horse serum, and 0.3% Triton X-100) for  
735 20 min and subsequently rinsed 3 x 10 minutes in 0.1 M PBS at room temperature.  
736 Then, the slides were incubated in primary antibody (Mouse anti-TH antibody, 1:1000,

737 product #MAB5280, Millipore, Billerica, MA, USA) for 1 hour at room temperature and  
738 36 hours at 4° C. After rinsing in PBS, the slides were incubated in secondary antibody  
739 (Alexa Fluor 488 donkey anti-mouse antibody, 1:200, product #R37114, Molecular  
740 Probes-Life Technologies, Eugene, OR, USA) for 4 hours at room temperature. The  
741 slides were rinsed in PBS, the excess liquid was drained, mounting medium  
742 (Fluoromount) was dropped on the tissue and slides were covered with glass  
743 coverslips (Fisherfinest). Images were acquired using a laser scanning confocal  
744 microscope (LSM800, Zeiss). For presentation purposes (color-blind safe) images  
745 were pseudo-colored and representative figures were prepared using the Zen 2  
746 software (Blue edition, Zeiss).

747

748

## 749 **Experiment 2: Effects of circulating TNF- $\alpha$ on carotid sinus nerve afferent** 750 **activity**

751 Animals were anesthetized with isoflurane (Induction 5% and maintenance 2.5% in  
752 100% O<sub>2</sub>) and subjected to femoral artery and vein catheterizations for arterial blood  
753 pressure (ABP) monitoring and drug administration, respectively, using polyethylene  
754 catheters (PE-50 attached to PE-10, Becton Dickinson, Sparks, MD, USA). Next,  
755 through a midline neck incision, the trachea was cannulated, and animals were  
756 artificially ventilated with a rodent ventilator (model 7025, Ugo Basile, Gemonio, VA,  
757 Italy). End-tidal CO<sub>2</sub> was maintained between 4 - 5% (Capstar-100 carbon dioxide  
758 analyzer, CWE, Ardmore, PA, USA) by adjusting tidal volume (0.7 - 0.8 mL/100 g of  
759 body weight) and respiratory rate (60 - 80 bpm). Isoflurane was slowly replaced with  
760 urethane anesthesia (1.2 - 1.4 g/kg of body weight, IV) given over 20 - 25 minutes.  
761 Then, O<sub>2</sub> concentration in ventilated air was switched to 50% O<sub>2</sub> (balance N<sub>2</sub>) and this  
762 condition was kept until the end of the experiments. This slightly hyperoxic  
763 concentration was chosen because it ensures a stable preparation without silencing  
764 carotid body activity as 100% O<sub>2</sub> would do (Kim et al., 2018; Schultz et al., 2007) and  
765 to avoid any period of hypoxia during the experimental protocol.

766 Then, animals were prepared for recordings of CSN afferent activity. The left  
767 carotid sinus nerve was identified, carefully isolated, and cut centrally at its junction to  
768 the glossopharyngeal nerve. CSN activity was recorded using bipolar suction  
769 electrodes and signals were filtered (100 - 3000 Hz), amplified (10,000 X) and digitally

770 sampled (10 kHz). After baseline recordings, TNF- $\alpha$  (500 ng in 0.5 mL sterile saline,  
771 IV; PeproTech, Rocky Hill, NJ, USA) was administered and CSN activity was recorded  
772 for additional 2 hours. This dose was chosen based on previous works studying the  
773 effects of TNF- $\alpha$  on renal SNA in vivo (Zhang et al. 2003, Wei et al. 2015). Reliability  
774 of CSN activity was confirmed at the end of experiments by a robust increase in  
775 electrical activity during the exposure to hypoxia (10% O<sub>2</sub>) for 60 - 90 seconds.

776  
777

### 778 **Experiment 3: Neuroanatomical identification of carotid body-related central** 779 **sympathoexcitatory pathways activated by circulating TNF- $\alpha$**

780 First, the animals were anesthetized with a mixture of ketamine (80 mg kg<sup>-1</sup>, IP; União  
781 Química Farmacêutica Nacional S/A, Embu-Guaçu, SP, Brazil) and xylazine (8 mg kg<sup>-1</sup>,  
782 IP; Hertape Calier Saúde animal S/A, Juatuba, MG, Brazil), and placed in a  
783 stereotaxic frame (David Kopf instruments, Tujunga, CA, USA). The retrograde tracer  
784 FluoroGold (FG, 2%, Fluorochrome, Denver, CO, USA) diluted in artificial  
785 cerebrospinal fluid (aCSF) was then bilaterally injected (40 nL) into the RVLM.  
786 Microinjections were performed with a pressure microinjector (Picospritzer III, Parker  
787 Hannifin, Hollis, NH, USA) using glass micropipettes. After each injection, the  
788 micropipette was kept in place for 2 minutes to prevent FG reflux. The coordinates  
789 used to target the RVLM were: 3.5 mm caudal from Lambda, 1.8 - 2.0 mm lateral from  
790 the midline, and 9.4 mm ventral from the skull surface. After injections, the skin  
791 incisions were sutured and the animals received anti-inflammatory ketoprofen (3 mg  
792 kg<sup>-1</sup>, SC) and antibiotics penicillin (50,000 IU, IM). This treatment was repeated every  
793 24 hours for 3 days.

794 After 6 days recovery, animals were subjected to bilateral carotid body ablation  
795 (CB-X group) or Sham procedure (Sham group) and femoral artery/vein  
796 catheterizations. Carotid body ablation was performed by combining two previously  
797 described methods (Katayama et al., 2015; Pijacka et al., 2018). Briefly, animals were  
798 anesthetized with ketamine/xylazine as previously described. The carotid body  
799 arteries were ligated and cut, followed by surgical removal of the carotid bodies on  
800 both sides. In this procedure, the carotid sinus nerve is maintained intact, preserving  
801 carotid baroreflex function (Pijacka et al., 2018). Sham procedure consisted in isolation  
802 of carotid body arteries and carotid bodies, but these structures were kept intact. Neck  
803 incisions were closed with sutures. Femoral artery/vein catheters were tunneled

804 subcutaneously, exteriorized and fixed in the interscapular region as previously  
805 described (Katayama et al., 2019). After surgeries, animals were treated with  
806 antibiotics and anti-inflammatory for 3 days as described before. To maintain catheters  
807 patency, arterial and venous catheters were flushed every day with heparinized saline  
808 (arterial: 500 U/mL, venous: 40 U/mL). Three days after surgery, ABP was recorded  
809 in unanesthetized rats under baseline conditions and in response to potassium  
810 cyanide (KCN; 40 ug/animal, IV) to verify the efficacy of carotid body ablation in CB-X  
811 group and the integrity of carotid bodies in SHAM group. Successful bilateral carotid  
812 body ablation was confirmed by the lack of cardiovascular responses to KCN (figure  
813 supplement 1A – B). Rats were allowed to recover for 3 days before the next  
814 experimental protocol.

815 On the day of the experiment (12 days after FG microinjections), rats were  
816 administered with TNF- $\alpha$  (500 ng in 0.5 mL sterile saline, IV) and left undisturbed for  
817 2 hours. Next, rats were deeply anesthetized with urethane (IV) and transcardially  
818 perfused with PBS followed by PFA. Brains were collected and fixed in PFA for 12  
819 hours at 4<sup>o</sup> C. Brains were then transferred to 20% sucrose solution and maintained  
820 at 4<sup>o</sup> C until the tissue sinks. Finally, brains were frozen in Tissue Freezing Medium  
821 (Triangle Biomedical Sciences, Durham, NC, USA) and coronal brain slices (30  $\mu$ m)  
822 containing the cNTS and the RVLM were obtained on a cryostat. The RVLM sections  
823 were mounted on microscope slides (Superfrost Plus, Fisher Scientific, Pittsburgh, PA,  
824 USA) and used to confirm the location of FluoroGold microinjections within RVLM  
825 region (From 12.48 mm to 12.00 mm caudal to bregma, ventral to the compact  
826 formation of the Nucleus Ambiguus) accordingly to the rat brain in stereotaxic  
827 coordinates atlas (Paxinos and Charles Watson, 2007). The cNTS sections were  
828 stored in cryoprotectant solution at -20<sup>o</sup> C until processing for c-FOS and VGlut2  
829 immunofluorescence as described below.

830 Briefly, sections were first rinsed in 0.1 M PBS for 10 minutes followed by  
831 incubation in blocking solution (0.1 M PBS, 10% normal horse serum, and 0.3% Triton  
832 X-100) for 20 min at room temperature. After rinsing 3 x 10 minutes in 0.1 M PBS at  
833 room temperature, slides were incubated in primary antibodies for c-FOS (1:1000,  
834 rabbit anti-c-FOS polyclonal antibody, product #sc-52, Santa Cruz Biotechnology,  
835 Santa Cruz, CA, USA) and for VGlut2 (1:2000, guinea pig anti-VGlut2 polyclonal  
836 antibody, product #AB2251-I, Millipore, Temecula, CA, USA) for 1 hour at room



837 temperature plus 36 hours at 4<sup>o</sup> C. After rinsing in PBS, slides were incubated in  
838 secondary antibodies against rabbit (1:400, donkey anti-rabbit Alexa Fluor 594,  
839 product #A-21207, Molecular Probes-Life Technologies, Eugene, OR, USA) and  
840 against anti-guinea pig (1:400, donkey anti-guinea pig Alexa Fluor 488, product #706-  
841 545-148, Jackson ImmunoResearch Inc, West Grove, PA, USA) for 4 hours at room  
842 temperature. Slides were rinsed in PBS, the excess liquid was drained, mounting  
843 medium (Fluoromount, product # F4680, Sigma, St. Louis, MO, USA) was dropped on  
844 the tissue and slides were covered with glass coverslips (Fisherfinest, product  
845 #125485M, Fisher Scientific).

846 Images were acquired using a laser scanning confocal microscope (LSM800  
847 with airyscan, Zeiss, Jena, TH, Germany). Quantification of retrograde labeled FG  
848 cells, c-FOS positive cells, FG/c-FOS cells, and FG/c-FOS/VGluT2 cells within the  
849 cNTS were performed on brainstem sections from three different rostro-caudal levels  
850 (between 14.76 mm to 14.04 mm caudal to bregma). These levels were chosen based  
851 on studies demonstrating NTS regions that are activated after carotid body stimulation  
852 (Cruz et al., 2010; Kline et al., 2010; Malheiros-Lima et al., 2020). As anatomical  
853 landmarks to identify the cNTS levels, we used: the area postrema, the central canal,  
854 the gracile nucleus, and the hypoglossal nucleus. Cell counting was performed on  
855 ImageJ software (U.S. National Institutes of Health, Bethesda, MD, USA) and  
856 representative figures were prepared using the Zen 2 software (Blue edition, Zeiss).

857

858

#### 859 **Experiment 4: Sympathetic responses to circulating TNF- $\alpha$ in Sham and carotid** 860 **body-ablated (CB-X) rats**

861 Animals were anesthetized, subjected to femoral artery/vein catheterizations,  
862 tracheotomized and continuously ventilated with 50% O<sub>2</sub> (balance N<sub>2</sub>) as described in  
863 *Experiment 2*. Next, animals were subjected to bilateral carotid body ablation or sham  
864 surgery as described in *Experiment 3*. All animals were then prepared for  
865 simultaneous recordings of lumbar, renal, and splanchnic sympathetic nerve activity  
866 (SNA). Lumbar sympathetic nerve was isolated through a midline laparotomy and  
867 retraction of vena cava, while renal and splanchnic sympathetic nerves were isolated  
868 through a retroperitoneal incision and careful retraction of the left kidney. Each  
869 sympathetic nerve was placed on a bipolar stainless-steel electrode and insulated with

870 KWIK-SIL (World Precision Instruments, Sarasota, FL, USA). The raw SNA signals  
871 were filtered (100 - 1000 Hz), amplified (10,000 X) using biological amplifiers (P511  
872 AC Amplifier, Grass Technologies, Warwick, RI, USA), displayed on oscilloscopes  
873 (TDS 2022, Tektronix, Beaverton, OR, USA) and digitally sampled (2 kHz) by a data  
874 acquisition system (Micro 1401, Cambridge Electronic Design Limited). All incisions  
875 were closed with surgical clips (Fine Science Tools, Foster City, CA, USA).

876 After stabilization (~30 minutes after the end of surgical procedures), baseline  
877 recordings of ABP, lumbar, renal and splanchnic SNA were performed. Next, TNF- $\alpha$   
878 (500 ng in 0.5 mL sterile saline, IV) was administered and ABP and SNA were  
879 recorded for additional 2 hours. At the end of the experiments, carotid body ablation  
880 was confirmed by the absence of blood pressure and SNA responses to KCN (40  
881 ug/animal, IV) and these results are presented in figure supplement 2A – B.

882

### 883 **Experiment 5: Plasma and spleen levels of pro-inflammatory cytokines following** 884 **intravenous TNF- $\alpha$ in SHAM, CB-X and SPL-X rats**

885 Rats were anesthetized with ketamine/xylazine and prepared accordingly one of the  
886 following experimental groups: 1) CB-X: Animals were subjected to bilateral ablation  
887 of the carotid bodies; 2) SPL-X: Animals were subjected to splanchnic denervation  
888 through celiac ganglionectomy as previously reported in the literature (Asirvatham-  
889 Jeyaraj et al., 2021; Li et al., 2010). Briefly, after a midline laparotomy, the visceral  
890 organs were gently retracted, and the celiac ganglion was localized and surgically  
891 removed using blunt forceps. 3) SHAM: The carotid bodies and the celiac ganglion  
892 were localized and manipulated, but these structures were kept intact. All animals  
893 were allowed to recover for 6 days. Next, animals were subjected to femoral  
894 artery/vein catheterizations. The efficacy of carotid body ablation in CB-X group and  
895 the integrity of carotid bodies in SHAM and SPL-X groups was verified three days after  
896 catheterizations and these results are presented in figure supplement 3A – B. Then,  
897 rats were allowed to recover for additional 3 days before the experimental protocol.

898 The experimental protocol consisted in the administration of TNF- $\alpha$  (500 ng, IV)  
899 or vehicle (sterile saline, IV) in SHAM, CB-X and SPL-X rats. After 2 hours, rats were  
900 deeply anesthetized for tissue collection. Blood was collected into EDTA-containing  
901 tubes, centrifuged (1500 rpm for 10 min) at 4<sup>o</sup> C and the plasma was aliquoted and  
902 stored at -80<sup>o</sup> C. Spleen was harvested, flash frozen using liquid nitrogen and stored  
903 at -80<sup>o</sup> C.

904 The spleen samples were homogenized in PBS using a Polytron tissue  
905 homogenizer, and then centrifuged at 10,000 rpm for 2 min at 4 °C. The plasma and  
906 splenic levels of cytokines were quantified by enzyme-linked immunosorbent assay  
907 (ELISA) using commercial kits DuoSet ELISA Development Systems (R&D Systems,  
908 Minneapolis, MN, USA) for TNF- $\alpha$  (catalog #DY510), IL-6 (catalog #DY506), and IL-  
909 10 (catalog #DY522) and following the user manual instructions. The results were  
910 expressed as cytokine concentration in pg/mL and pg/mg of protein, based on  
911 standard curves, respectively. Spleen norepinephrine was measured as previously  
912 described (Garofalo et al., 1996) using HPLC (LC20AT-Shimadzu Proeminence)  
913 coupled to an electrochemical detector (Decade Lite-Antec Scientific) with a 5- $\mu$ m  
914 Spherisorb ODS-2 reversed-phase column (Sigma-Aldrich) and the results were  
915 expressed as norepinephrine concentration in ng/g of tissue.

916

917

### 918 **Statistical analysis**

919 All statistical analyses were performed using IBM SPSS Statistics (version 25, IBM  
920 corporation). Data are reported as means  $\pm$  SEM. The significance level was set at  $p$   
921  $< 0.05$ , unless otherwise stated. No outliers were found as assessed by boxplot  
922 analyses. *Experiment 2:* To examine differences between means within the same  
923 group over time, the one-way repeated measures analysis of variance (ANOVA)  
924 followed by post hoc analysis with Bonferroni adjustment was performed. The normal  
925 distribution of the data was verified and confirmed by the Shapiro-Wilk test, and the  
926 Mauchly's test indicated that the assumption of sphericity has not been violated.  
927 *Experiment 3:* To determine differences between two groups at a single time-point, we  
928 first assessed the distribution of the data using the Shapiro-Wilk test and the  
929 homogeneity of variances using the Levene's test. For normally distributed data with  
930 homogenous variances, an unpaired two-tailed Student's  $t$ -test was performed. In  
931 cases in which the data was normally distributed but the assumption of homogeneity  
932 of variances was violated, an unpaired two-tailed Welch's  $t$ -test was used. When data  
933 was not normally distributed, an unpaired two-tailed Mann-Whitney  $U$ -test was applied.  
934 *Experiment 4:* To determine group x time interactions, a two-way repeated measures  
935 ANOVA was conducted. In this case, the normal distribution of the studentized  
936 residuals was verified and confirmed by the Shapiro-Wilk test. The sphericity for the  
937 interaction term was assessed by the Mauchly's test. When the assumption of

938 sphericity was violated, the Greenhouse-Geisser correction was used and the  
939 estimated epsilon ( $\epsilon$ ) value was reported. Once statistically significant group x time  
940 interactions were detected, simple main effects of group were analyzed using repeated  
941 measures general linear models with Bonferroni adjustment. *Experiment 5*: To  
942 examine group x treatment interactions and main effects of group, a two-way ANOVA  
943 with Bonferroni post hoc was performed. The distribution of the residuals was  
944 examined by the Shapiro-Wilk test. The homoscedasticity was analyzed by the  
945 Levene's test and by plotting the residuals against the predicted values in a simple  
946 scatterplot. If the assumptions of normal distribution and/or homoscedasticity were  
947 violated, the dependent variable was log-transformed when appropriate. When both  
948 the assumptions of normality and homoscedasticity (requirements for two-way  
949 ANOVA) were not satisfied even after transformation, a Kruskal-Wallis followed by  
950 Mann-Whitney *U*-tests for pairwise comparisons between groups were performed. In  
951 these cases, a Bonferroni adjustment to alpha values was applied and the statistical  
952 significance was accepted at the  $p < 0.003$  level. In cases in which only the assumption  
953 of homoscedasticity was violated, a Welch's ANOVA followed by a Games-Howell  
954 post hoc was used to compare groups.

955

956

957

958

959

960

961

962

963

964

965

966

967

968

969

970

971

972 **Acknowledgments**

973 The authors thank Lilian do Carmo Heck for the excellent technical assistance. This  
974 work was funded by the São Paulo Research Foundation (FAPESP; grants  
975 #2019/11196-0 and #2015/23467-7), CNPq, and PROPE-UNESP.

976

977 **Author contributions**

978 P.L.K. and E.C. conceived and designed research. P.L.K. performed all in vivo  
979 experiments. P.L.K. and I.P.L. performed immunofluorescence and in situ  
980 hybridization. A.K. and J.P.M.L. performed ELISA. L.C.C.N. performed HPLC  
981 measurements. P.L.K., I.P.L., A.K., and J.P.M.L. analyzed data. P.L.K., I.P.L., A.K.,  
982 D.B.Z, and E.C. interpreted data. P.L.K. and A.K. drafted the manuscript. P.L.K., I.P.L.,  
983 A.K., J.P.M.L., F.Q.C., L.C.C.N., J.V.M., D.B.Z., D.S.A.C., and E.C. edited and revised  
984 the manuscript. P.L.K., I.P.L., A.K., J.P.M.L., F.Q.C., L.C.C.N, J.V.M., D.B.Z.,  
985 D.S.A.C., and E.C. read and approved the final version of the manuscript.

986

987 **Competing interests**

988 The authors declare no competing interests.

989

990 **Materials & correspondence**

991 Correspondence and requests for materials should be addressed to P.L.K. and/or E.C.

992

993

994

995

996

997

998

999

1000

1001

1002

1003



1004 **REFERENCES**

1005

1006 Abe C, Inoue T, Inglis MA, Viar KE, Huang L, Ye H, Rosin DiL, Stornetta  
1007 RL, Okusa MD, Guyenet PG. 2017. C1 neurons mediate a stress-  
1008 induced anti-inflammatory reflex in mice. *Nature Neuroscience*  
1009 **20**:700–707. doi:10.1038/nn.4526

1010 Aicher SA, Saravay RH, Cravo S, Jeske I, Morrison SF, Reis DJ, Milner  
1011 TA. 1996. Monosynaptic projections from the nucleus tractus solitarii  
1012 to C1 adrenergic neurons in the rostral ventrolateral medulla:  
1013 Comparison with input from the caudal ventrolateral medulla. *Journal*  
1014 *of Comparative Neurology* **373**:62–75. doi:10.1002/(SICI)1096-  
1015 9861(19960909)373:1<62::AID-CNE6>3.0.CO;2-B

1016 Allen AM. 1998. Angiotensin AT1 receptor-mediated excitation of rat  
1017 carotid body chemoreceptor afferent activity. *Journal of Physiology*  
1018 **510**:773–781. doi:10.1111/j.1469-7793.1998.773bj.x

1019 Asirvatham-Jeyaraj N, Gauthier MM, Banek CT, Ramesh A, Garver H,  
1020 Fink GD, Osborn JW. 2021. Renal Denervation and Celiac  
1021 Ganglionectomy Decrease Mean Arterial Pressure Similarly in  
1022 Genetically Hypertensive Schlager (BPH/2J) Mice. *Hypertension*  
1023 **519**–528. doi:10.1161/HYPERTENSIONAHA.119.14069

1024 Bassi GS, Dias DPM, Franchin M, Talbot J, Reis DG, Menezes GB,  
1025 Castania JA, Garcia-Cairasco N, Resstel LBM, Salgado HC, Cunha  
1026 FQ, Cunha TM, Ulloa L, Kanashiro A. 2017. Modulation of  
1027 experimental arthritis by vagal sensory and central brain stimulation.  
1028 *Brain, Behavior, and Immunity* **64**:330–343.  
1029 doi:10.1016/j.bbi.2017.04.003

1030 Bassi GS, Kanashiro A, Coimbra NC, Terrando N, Maixner W, Ulloa L.  
1031 2020. Anatomical and clinical implications of vagal modulation of the  
1032 spleen. *Neuroscience and Biobehavioral Reviews* **112**:363–373.

- 1033        doi:10.1016/j.neubiorev.2020.02.011
- 1034    Bautista LE, Vera LM, Arenas IA, Gamarra G. 2005. Independent  
1035        association between inflammatory markers ( C-reactive protein ,  
1036        interleukin-6 , and TNF- a ) and essential hypertension 149–154.  
1037        doi:10.1038/sj.jhh.1001785
- 1038    Borovikova L V., Ivanova S, Zhang M, Yang H, Botchkina GI, Watkins  
1039        LR, Wang H, Abumrad N, Eaton JW, Tracey KJ. 2000. Vagus nerve  
1040        stimulation attenuates the systemic inflammatory response to  
1041        endotoxin. *Nature* **405**:458–462. doi:10.1038/35013070
- 1042    Chang EH, Chavan SS, Pavlov VA. 2019. Cholinergic control of  
1043        inflammation, metabolic dysfunction, and cognitive impairment in  
1044        obesity-associated disorders: Mechanisms and novel therapeutic  
1045        opportunities. *Frontiers in Neuroscience* **13**:1–13.  
1046        doi:10.3389/fnins.2019.00263
- 1047    Colombari E, Menani J V, Talman WT. 1996. Commissural NTS  
1048        contributes to pressor responses to glutamate injected into the  
1049        medial NTS of awake rats. *American Journal of Physiology-*  
1050        *Regulatory, Integrative and Comparative Physiology* **270**:R1220–  
1051        R1225. doi:10.1152/ajpregu.1996.270.6.R1220
- 1052    Cruz J de C, Bonagamba LGH, Stern JE, Machado BH. 2010. Fos  
1053        expression in the NTS in response to peripheral chemoreflex  
1054        activation in awake rats. *Autonomic Neuroscience: Basic and Clinical*  
1055        **152**:27–34. doi:10.1016/j.autneu.2009.08.016
- 1056    da Silva EF, Bassi M, Menani JV, Colombari DSA, Zoccal DB, Pedrino  
1057        GR, Colombari E. 2019. Carotid bodies contribute to  
1058        sympathoexcitation induced by acute salt overload. *Experimental*  
1059        *Physiology* **104**:15–27. doi:<https://doi.org/10.1113/EP087110>
- 1060    Erickson JT, Millhorn DE. 1994. Hypoxia and electrical stimulation of the  
1061        carotid sinus nerve induce fos-like immunoreactivity within

- 1062 catecholaminergic and serotonergic neurons of the rat brainstem.  
1063 *Journal of Comparative Neurology* **348**:161–182.  
1064 doi:10.1002/cne.903480202
- 1065 Fernández R, González S, Rey S, Cortés PP, Maisey KR, Reyes EP,  
1066 Larraín C, Zapata P. 2008. Lipopolysaccharide-induced carotid body  
1067 inflammation in cats: Functional manifestations, histopathology and  
1068 involvement of tumour necrosis factor- $\alpha$ . *Experimental Physiology*  
1069 **93**:892–907. doi:10.1113/expphysiol.2008.041152
- 1070 Ferreira CB, Cravo SL, Stocker SD. 2018. Airway obstruction produces  
1071 widespread sympathoexcitation: role of hypoxia, carotid  
1072 chemoreceptors, and NTS neurotransmission. *Physiological Reports*  
1073 **6**. doi:10.14814/phy2.13536
- 1074 Filiano AJ, Xu Y, Tustison NJ, Marsh RL, Baker W, Smirnov I, Overall  
1075 CC, Gadani SP, Turner SD, Weng Z, Peerzade SN, Chen H, Lee  
1076 KS, Scott MM, Beenhakker MP, Litvak V, Kipnis J. 2016.  
1077 Unexpected role of interferon- $\gamma$  3 in regulating neuronal connectivity  
1078 and social behaviour. *Nature* **535**:425–429.  
1079 doi:10.1038/nature18626
- 1080 Fonseca MT, Moretti EH, Marques LMM, MacHado BF, Brito CF,  
1081 Guedes JT, Komegae EN, Vieira TS, Festuccia WT, Lopes NP,  
1082 Steiner AA. 2021. A leukotriene-dependent spleen-liver axis drives  
1083 TNF production in systemic inflammation. *Science Signaling* **14**.  
1084 doi:10.1126/scisignal.abb0969
- 1085 Garofalo MAR, Kettelhut IC, Roselino JES, Migliorini RH. 1996. Effect of  
1086 acute cold exposure on norpinephrine turnover rates in rat white  
1087 adipose tissue. *Journal of the Autonomic Nervous System* **60**:206–  
1088 208. doi:10.1016/0165-1838(96)00037-9
- 1089 Grieve AG, Xu H, Künzel U, Bambrough P, Sieber B, Freeman M. 2017.  
1090 Phosphorylation of iRhom2 at the plasma membrane controls

- 1091 mammalian TACE-dependent inflammatory and growth factor  
1092 signalling. *eLife* **6**:1–22. doi:10.7554/eLife.23968
- 1093 Jendzjowsky NG, Roy A, Barioni NO, Kelly MM, Green FHY, Wyatt CN,  
1094 Pye RL, Tenorio-Lopes L, Wilson RJA. 2018. Preventing acute  
1095 asthmatic symptoms by targeting a neuronal mechanism involving  
1096 carotid body lysophosphatidic acid receptors. *Nature*  
1097 *Communications* **9**:1–15. doi:10.1038/s41467-018-06189-y
- 1098 Jendzjowsky NG, Roy A, Iftinca M, Barioni NO, Kelly MM, Herrington  
1099 BA, Visser F, Altier C, Wilson RJA. 2021. PKC $\epsilon$  stimulation of  
1100 TRPV1 orchestrates carotid body responses to asthmakines. *Journal*  
1101 *of Physiology* **599**:1335–1354. doi:10.1113/JP280749
- 1102 Kanashiro A, Sônego F, Ferreira RG, Castanheira FVS, Leite CA,  
1103 Borges VF, Nascimento DC, Cólón DF, Alves-Filho JC, Ulloa L,  
1104 Cunha FQ. 2017. Therapeutic potential and limitations of cholinergic  
1105 anti-inflammatory pathway in sepsis. *Pharmacological Research*  
1106 **117**:1–8. doi:10.1016/j.phrs.2016.12.014
- 1107 Katayama PL. 2016. Adrenaline and the carotid body during  
1108 hypoglycaemia: an amplifying mechanism? *Journal of Physiology*  
1109 **594**:7161–7162. doi:10.1113/JP273238
- 1110 Katayama PL, Castania JA, Dias DPM, Patel KP, Fazan R, Salgado HC.  
1111 2015. Role of Chemoreceptor Activation in Hemodynamic  
1112 Responses to Electrical Stimulation of the Carotid Sinus in  
1113 Conscious Rats. *Hypertension* **66**:598–603.  
1114 doi:10.1161/HYPERTENSIONAHA.115.05316
- 1115 Katayama PL, Castania JA, Fazan R, Salgado HC. 2019. Interaction  
1116 between baroreflex and chemoreflex in the cardiorespiratory  
1117 responses to stimulation of the carotid sinus/nerve in conscious rats.  
1118 *Autonomic Neuroscience: Basic and Clinical* **216**:17–24.  
1119 doi:10.1016/j.autneu.2018.12.001

- 1120 Kim SJ, Fong AY, Pilowsky PM, Abbott SBG. 2018. Sympathoexcitation  
1121 following intermittent hypoxia in rat is mediated by circulating  
1122 angiotensin II acting at the carotid body and subfornical organ.  
1123 *Journal of Physiology* **596**:3217–3232. doi:10.1113/JP275804
- 1124 Kline DD, King TL, Austgen JR, Heesch CM, Hasser EM. 2010. Sensory  
1125 afferent and hypoxia-mediated activation of nucleus tractus solitarius  
1126 neurons that project to the rostral ventrolateral medulla.  
1127 *Neuroscience* **167**:510–527.  
1128 doi:10.1016/j.neuroscience.2010.02.012
- 1129 Koshiya N, Guyenet PG. 1996. Tonic sympathetic chemoreflex after  
1130 blockade of respiratory rhythmogenesis in the rat. *Journal of*  
1131 *Physiology* **491**:859–869. doi:10.1113/jphysiol.1996.sp021263
- 1132 Kox M, Van Eijk LT, Zwaag J, Van Den Wildenberg J, Sweep FCGJ,  
1133 Van Der Hoeven JG, Pickkers P. 2014. Voluntary activation of the  
1134 sympathetic nervous system and attenuation of the innate immune  
1135 response in humans. *Proceedings of the National Academy of*  
1136 *Sciences of the United States of America* **111**:7379–7384.  
1137 doi:10.1073/pnas.1322174111
- 1138 Kressel AM, Tsaava T, Levine YA, Chang EH, Addorisio ME, Chang Q,  
1139 Burbach BJ, Carnevale D, Lembo G, Zador AM, Andersson U,  
1140 Pavlov VA, Chavan SS, Tracey KJ. 2020. Identification of a  
1141 brainstem locus that inhibits tumor necrosis factor. *Proceedings of*  
1142 *the National Academy of Sciences of the United States of America*  
1143 **117**:29803–29810. doi:10.1073/pnas.2008213117
- 1144 Kumar P, Prabhakar NR. 2012. Peripheral chemoreceptors: Function  
1145 and plasticity of the carotid body. *Comprehensive Physiology* **2**:141–  
1146 219. doi:10.1002/cphy.c100069
- 1147 Lankadeva YR, May CN, McKinley MJ, Neeland MR, Ma S, Hocking DM,  
1148 Robins-Browne R, Bedoui S, Farmer DGS, Bailey SR, Martelli D,



- 1149 McAllen RM. 2020. Sympathetic nerves control bacterial clearance.  
1150 *Scientific Reports* **10**:1–8. doi:10.1038/s41598-020-72008-4
- 1151 Li DJ, Evans RG, Yang ZW, Song SW, Wang P, Ma XJ, Liu C, Xi T, Su  
1152 DF, Shen FM. 2011. Dysfunction of the cholinergic anti-inflammatory  
1153 pathway mediates organ damage in hypertension. *Hypertension*  
1154 **57**:298–307. doi:10.1161/HYPERTENSIONAHA.110.160077
- 1155 Li M, Galligan J, Wang D, Fink G. 2010. The effects of celiac  
1156 ganglionectomy on sympathetic innervation to the splanchnic organs  
1157 in the rat. *Autonomic Neuroscience: Basic and Clinical* **154**:66–73.  
1158 doi:10.1016/j.autneu.2009.11.009
- 1159 Luise King T, Heesch CM, Clark CG, Kline DD, Hasser EM. 2012.  
1160 Hypoxia activates nucleus tractus solitarii neurons projecting to the  
1161 paraventricular nucleus of the hypothalamus. *American Journal of*  
1162 *Physiology - Regulatory Integrative and Comparative Physiology*  
1163 **302**. doi:10.1152/ajpregu.00028.2012
- 1164 Ma Y, Zhao S, Shen S, Fang S, Ye Z, Shi Z, Hong A. 2015. A novel  
1165 recombinant slow-release TNF  $\alpha$ -derived peptide effectively inhibits  
1166 tumor growth and angiogenesis. *Scientific Reports* **5**:1–17.  
1167 doi:10.1038/srep13595
- 1168 Malheiros-Lima MR, Silva JN, Souza FC, Takakura AC, Moreira TS.  
1169 2020. C1 neurons are part of the circuitry that recruits active  
1170 expiration in response to peripheral chemoreceptors activation. *eLife*  
1171 **9**:1–23. doi:10.7554/eLife.52572
- 1172 Marcus NJ, Del Rio R, Schultz EP, Xia X-H, Schultz HD. 2014. Carotid  
1173 body denervation improves autonomic and cardiac function and  
1174 attenuates disordered breathing in congestive heart failure. *The*  
1175 *Journal of Physiology* **592**:391–408.  
1176 doi:10.1113/jphysiol.2013.266221
- 1177 Martelli D, Yao ST, Mckinley MJ, Mcallen RM. 2014. Reflex control of

- 1178 inflammation by sympathetic nerves, not the vagus. *Journal of*  
1179 *Physiology* **592**:1677–1686. doi:10.1113/jphysiol.2013.268573
- 1180 McBryde FD, Abdala AP, Hendy EB, Pijacka W, Marvar P, Moraes DJA,  
1181 Sobotka PA, Paton JFR. 2013. The carotid body as a putative  
1182 therapeutic target for the treatment of neurogenic hypertension.  
1183 *Nature Communications* **4**:1–11. doi:10.1038/ncomms3395
- 1184 Melo MR, Gasparini S, Speretta GF, Silva EF, Rodrigues Pedrino G,  
1185 Menani J V, Zoccal DB, Colombari DSA, Colombari E. 2019.  
1186 Importance of the commissural nucleus of the solitary tract in  
1187 renovascular hypertension. *Hypertension Research* **42**:587–597.  
1188 doi:10.1038/s41440-018-0190-6
- 1189 Mkrtchian S, Kåhlin J, Ebberyd A, Gonzalez C, Sanchez D, Balbir A,  
1190 Kostuk EW, Shirahata M, Fagerlund MJ, Eriksson LI. 2012. The  
1191 human carotid body transcriptome with focus on oxygen sensing and  
1192 inflammation - a comparative analysis. *Journal of Physiology*  
1193 **590**:3807–3819. doi:10.1113/jphysiol.2012.231084
- 1194 Morrison SF. 2001. Differential control of sympathetic outflow. *American*  
1195 *Journal of Physiology - Regulatory Integrative and Comparative*  
1196 *Physiology* **281**. doi:10.1152/ajpregu.2001.281.3.r683
- 1197 Mughrabi IT, Hickman J, Jayaprakash N, Thompson D, Ahmed U,  
1198 Papadoyannis ES, Chang YC, Abbas A, Datta-Chaudhuri T, Chang  
1199 EH, Zanos TP, Lee SC, Froemke RC, Tracey KJ, Welle C, Al-Abed  
1200 Y, Zanos S. 2021. Development and characterization of a chronic  
1201 implant mouse model for vagus nerve stimulation. *eLife* **10**:1–24.  
1202 doi:10.7554/ELIFE.61270
- 1203 Murray K, Rude KM, Sladek J, Reardon C. 2021. Divergence of  
1204 neuroimmune circuits activated by afferent and efferent vagal nerve  
1205 stimulation in the regulation of inflammation. *Journal of Physiology*  
1206 **599**:2075–2084. doi:10.1113/JP281189

- 1207 Nardocci G, Martin A, Abarzúa S, Rodríguez J, Simon F, Reyes EP,  
1208 Acuña-Castillo C, Navarro C, Cortes PP, Fernández R. 2015. Sepsis  
1209 progression to multiple organ dysfunction in carotid chemo/baro-  
1210 denervated rats treated with lipopolysaccharide. *Journal of*  
1211 *Neuroimmunology* **278**:44–52. doi:10.1016/j.jneuroim.2014.12.002
- 1212 Narkiewicz K, Ratcliffe LEK, Hart EC, Briant LJB, Chrostowska M, Wolf  
1213 J, Szyndler A, Hering D, Abdala AP, Manghat N, Burchell AE, Durant  
1214 C, Lobo MD, Sobotka PA, Patel NK, Leiter JC, Engelman ZJ,  
1215 Nightingale AK, Paton JFR. 2016. Unilateral Carotid Body Resection  
1216 in Resistant Hypertension: A Safety and Feasibility Trial. *JACC:*  
1217 *Basic to Translational Science* **1**:313–324.  
1218 doi:10.1016/j.jacbts.2016.06.004
- 1219 Neff RA, Mihalevich M, Mendelowitz D. 1998. Stimulation of NTS  
1220 activates NMDA and non-NMDA receptors in rat cardiac vagal  
1221 neurons in the nucleus ambiguus. *Brain Research* **792**:277–282.  
1222 doi:10.1016/S0006-8993(98)00149-8
- 1223 Niewinski P, Janczak D, Rucinski A, Tubek S, Engelman ZJ, Piesiak P,  
1224 Jazwiec P, Banasiak W, Fudim M, Sobotka PA, Javaheri S, Hart  
1225 ECJ, Paton JFR, Ponikowski P. 2017. Carotid body resection for  
1226 sympathetic modulation in systolic heart failure: results from first-in-  
1227 man study. *European Journal of Heart Failure* **19**:391–400.  
1228 doi:10.1002/ejhf.641
- 1229 Norlander AE, Madhur MS, Harrison DG. 2018. The immunology of  
1230 hypertension *The Journal of Experimental Medicine* 21–34.
- 1231 Paxinos G, Charles Watson. 2007. *The Rat Brain in Stereotaxic*  
1232 *Coordinates Sixth Edition*, Elsevier Academic Press.
- 1233 Pijacka W, Katayama PL, Salgado HC, Lincevicius GS, Campos RR,  
1234 McBryde FD, Paton JFR, Schultz H, Powell F. 2018. Variable role of  
1235 carotid bodies in cardiovascular responses to exercise , hypoxia and

- 1236 hypercapnia in spontaneously hypertensive rats **00**:1–16.  
1237 doi:10.1113/JP275487
- 1238 Rauchhaus M, Doehner W, Francis DP, Davos C, Kemp M, Liebenthal  
1239 C, Niebauer J, Hooper J, Volk HD, Coats AJS, Anker SD. 2000.  
1240 Plasma cytokine parameters and mortality in patients with chronic  
1241 heart failure. *Circulation* **102**:3060–3067.  
1242 doi:10.1161/01.CIR.102.25.3060
- 1243 Schultz HD, Li YL, Ding Y. 2007. Arterial chemoreceptors and  
1244 sympathetic nerve activity: Implications for hypertension and heart  
1245 failure. *Hypertension* **50**:6–13.  
1246 doi:10.1161/HYPERTENSIONAHA.106.076083
- 1247 Sesso HD, Jiménez MC, Wang L, Ridker PM, Buring JE, Michael  
1248 Gaziano J. 2015. Plasma inflammatory markers and the risk of  
1249 developing hypertension in men. *Journal of the American Heart*  
1250 *Association* **4**:1–9. doi:10.1161/JAHA.115.001802
- 1251 Shin MK, Eraso CC, Mu YP, Gu C, Yeung BHY, Kim LJ, Liu XR, Wu ZJ,  
1252 Paudel O, Pichard LE, Shirahata M, Tang WY, Sham JSK, Polotsky  
1253 VY. 2019. Leptin Induces Hypertension Acting on Transient  
1254 Receptor Potential Melastatin 7 Channel in the Carotid Body.  
1255 *Circulation Research* **125**:989–1002.  
1256 doi:10.1161/CIRCRESAHA.119.315338
- 1257 Shu HF, Wang BR, Wang SR, Yao W, Huang HP, Zhou Z, Wang X, Fan  
1258 J, Wang T, Ju G. 2007. IL-1 $\beta$  inhibits IK and increases [Ca<sup>2+</sup>]<sub>i</sub> in the  
1259 carotid body glomus cells and increases carotid sinus nerve firings in  
1260 the rat. *European Journal of Neuroscience* **25**:3638–3647.  
1261 doi:10.1111/j.1460-9568.2007.05586.x
- 1262 Simó R, Barbosa-Desongles A, Lecube A, Hernandez C, Selva DM.  
1263 2012. Potential role of tumor necrosis factor- $\alpha$  in downregulating sex  
1264 hormone-binding globulin. *Diabetes* **61**:372–382. doi:10.2337/db11-

- 1265           0727
- 1266 Steinman L. 2004. Elaborate interactions between the immune and  
1267 nervous systems. *Nature Immunology* **5**:575–581.  
1268 doi:10.1038/ni1078
- 1269 Tanaka S, Abe C, Abbott SBG, Zheng S, Yamaoka Y, Lipsey JE,  
1270 Skrypnyk NI, Yao J, Inoue T, Nash WT, Stornetta DS, Rosin DL,  
1271 Stornetta RL, Guyenet PG, Okusa MD. 2021. Vagus nerve  
1272 stimulation activates two distinct neuroimmune circuits converging in  
1273 the spleen to protect mice from kidney injury. *Proceedings of the  
1274 National Academy of Sciences of the United States of America*  
1275 **118**:1–12. doi:10.1073/PNAS.2021758118
- 1276 Thompson EL, Ray CJ, Holmes AP, Pye RL, Wyatt CN, Coney AM,  
1277 Kumar P. 2016. Adrenaline release evokes hyperpnoea and an  
1278 increase in ventilatory CO<sub>2</sub> sensitivity during hypoglycaemia: a role  
1279 for the carotid body. *Journal of Physiology* **594**:4439–4452.  
1280 doi:10.1113/JP272191
- 1281 Tromp TR, Mahesh D, Joles JA, Ramchandra R. 2018. Direct recording  
1282 of cardiac and renal sympathetic nerve activity shows differential  
1283 control in renovascular hypertension. *Hypertension* **71**:1108–1116.  
1284 doi:10.1161/HYPERTENSIONAHA.117.10749
- 1285 van Maanen MA, Vervoordeldonk MJ, Tak PP. 2009. The cholinergic  
1286 anti-inflammatory pathway: Towards innovative treatment of  
1287 rheumatoid arthritis. *Nature Reviews Rheumatology* **5**:229–232.  
1288 doi:10.1038/nrrheum.2009.31
- 1289 van Westerloo DJ, Choi G, Löwenberg EC, Truijien J, de Vos AF, Endert  
1290 E, Meijers JCM, Zhou L, Pereira MPFL, Queiroz KCS, Diks SH, Levi  
1291 M, Peppelenbosch MP, van der Poll T. 2011. Acute stress elicited by  
1292 bungee jumping suppresses human innate immunity. *Molecular  
1293 Medicine* **17**:180–188. doi:10.2119/molmed.2010.00204



- 1294 Wang X, Wang BR, Duan XL, Zhang P, Ding YQ, Jia Y, Jiao XY, Ju G.  
1295 2002. Strong expression of interleukin-1 receptor type I in the rat  
1296 carotid body. *Journal of Histochemistry and Cytochemistry* **50**:1677–  
1297 1684. doi:10.1177/002215540205001213
- 1298 Watkins LR, Goehler LE, Relton JK, Tartaglia N, Silbert L, Martin D,  
1299 Maier SF. 1995. Blockade of interleukin-1 induced hyperthermia by  
1300 subdiaphragmatic vagotomy: evidence for vagal mediation of  
1301 immune-brain communication. *Neuroscience Letters* **183**:27–31.  
1302 doi:10.1016/0304-3940(94)11105-R
- 1303 Wei S, Zhang Z, Beltz TG, Yu Y, Johnson AK, Felder RB. 2013.  
1304 Subfornical Organ Mediates Sympathetic and Hemodynamic  
1305 Responses to Blood-Borne Proinflammatory Cytokines 118–125.  
1306 doi:10.1161/HYPERTENSIONAHA.113.01404
- 1307 Willis A, Mihalevich M, Neff RA, Mendelowitz D. 1996. Three types of  
1308 postsynaptic glutamatergic receptors are activated in DMNX neurons  
1309 upon stimulation of NTS. *American Journal of Physiology -*  
1310 *Regulatory Integrative and Comparative Physiology* **271**.  
1311 doi:10.1152/ajpregu.1996.271.6.r1614
- 1312 Yuan G, Peng YJ, Khan SA, Nanduri J, Singh A, Vasavda C, Semenza  
1313 GL, Kumar GK, Snyder SH, Prabhakar NR. 2016. H<sub>2</sub>S production by  
1314 reactive oxygen species in the carotid body triggers hypertension in  
1315 a rodent model of sleep apnea. *Science Signaling* **9**:1–11.  
1316 doi:10.1126/scisignal.aaf3204
- 1317 Zera T, Moraes DJA, da Silva MP, Fisher JP, Paton JFR. 2019. The  
1318 Logic of Carotid Body Connectivity to the Brain. *Physiology* **34**:264–  
1319 282. doi:10.1152/physiol.00057.2018
- 1320 Zhang ZH, Wei SG, Francis J, Felder RB. 2003. Cardiovascular and  
1321 renal sympathetic activation by blood-borne TNF- $\alpha$  in rat: The role of  
1322 central prostaglandins. *American Journal of Physiology - Regulatory*

1323 *Integrative and Comparative Physiology* **284**:916–927.

1324 doi:10.1152/ajpregu.00406.2002

1325

1326

1327

1328

1329

1330

1331

1332

1333

1334

1335

1336

1337

1338

1339

1340

1341

1342

1343

1344

1345

1346

1347

1348

1349

1350

1351

1352

1353

1354

1355

1356

1357

1358  
1359  
1360  
1361  
1362  
1363  
  
1364  
  
1365  
1366  
1367  
1368  
1369  
1370  
1371  
1372  
1373  
1374  
  
1375  
  
1376  
  
1377  
  
1378  
1379  
1380  
1381  
1382  
1383  
1384  
1385  
1386  
1387  
1388  
1389  
1390  
1391  
1392  
1393  
1394  
1395

## Supplementary Information

### The Carotid Body Detects Circulating Tumor Necrosis Factor-Alpha to Activate a Sympathetic Anti-Inflammatory Reflex

Pedro L. Katayama<sup>1</sup>, Isabela P. Leirão<sup>1</sup>, Alexandre Kanashiro<sup>2</sup>, João Paulo M. Luiz<sup>2</sup>, Fernando Q. Cunha<sup>2</sup>, Luiz C. C. Navegantes<sup>3</sup>, Jose V. Menani<sup>1</sup>, Daniel B. Zoccal<sup>1</sup>, Débora S. A. Colombari<sup>1</sup> & Eduardo Colombari<sup>1</sup>

**Affiliations:** <sup>1</sup>Department of Physiology and Pathology, School of Dentistry, São Paulo State University, Araraquara, São Paulo, Brazil. <sup>2</sup>Department of Pharmacology, Ribeirão Preto Medical School, University of São Paulo, Ribeirão Preto, São Paulo, Brazil. <sup>3</sup>Department of Physiology, Ribeirão Preto Medical School, University of São Paulo, Ribeirão Preto, São Paulo, Brazil.

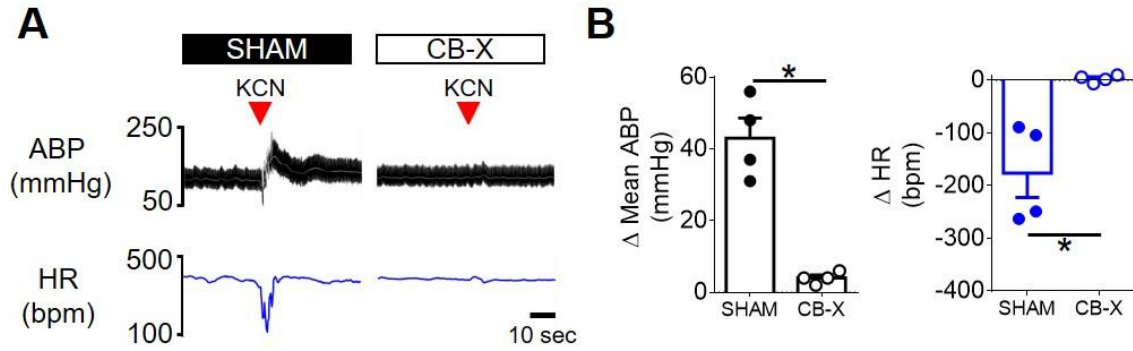

1396  
1397  
1398  
1399  
1400  
1401  
1402  
1403  
1404  
1405  
1406  
1407  
1408  
1409  
1410  
1411  
1412  
1413  
1414  
1415  
1416  
1417  
1418  
1419  
1420  
1421  
1422  
1423  
1424  
1425  
1426  
1427

**Figure supplement 1.** Verification of carotid body ablation in *experiment 3*. **A.** Representative tracings of arterial blood pressure (pulsatile ABP, black; mean ABP, white) and heart rate (HR; blue) of a SHAM rat (left) and of a CB-X rat (right) in response to KCN (red arrowhead, 40  $\mu$ g, IV) under unanesthetized conditions. **B.** Summary data showing the peak changes in mean ABP and HR in response to KCN from SHAM (filled symbols, n = 4) and CB-X (open symbols, n = 4) rats. The cardiovascular responses to carotid body stimulation by intravenous KCN were abolished in CB-X rats, confirming the efficacy of bilateral carotid body ablation:  $\Delta$  mean ABP (SHAM,  $43 \pm 6$  mmHg; CB-X,  $4 \pm 1$  mmHg;  $t(3.128) = 6.912$ ,  $p = 0.005$ , Welch's *t*-test),  $\Delta$  HR (SHAM,  $-176 \pm 46$  bpm; CB-X,  $3 \pm 3$  bpm;  $t(3.033) = -3.866$ ,  $p = 0.03$ , Welch's *t*-test). \* $p < 0.05$ . Data are means  $\pm$  SEM.

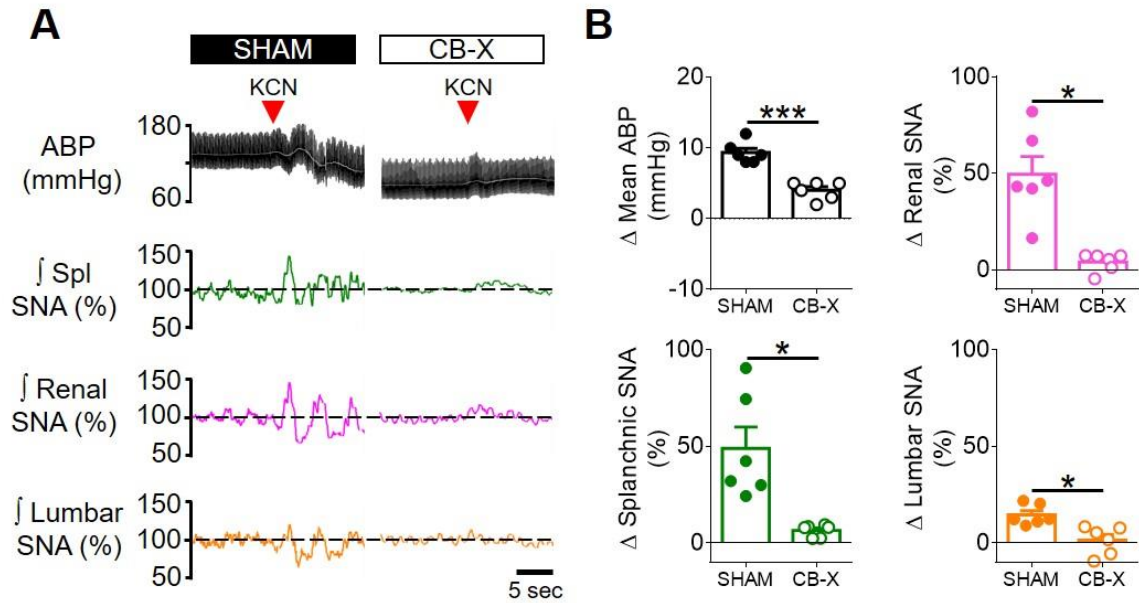

1428  
1429  
1430  
1431  
1432  
1433  
1434  
1435  
1436  
1437  
1438  
1439  
1440  
1441  
1442  
1443  
1444  
1445  
1446  
1447  
1448  
1449  
1450  
1451  
1452  
1453  
1454  
1455  
1456

**Figure supplement 2.** Verification of carotid body ablation at the end of *experiment 4*. **A.** Representative tracings of arterial blood pressure (pulsatile ABP, black; mean ABP, white), splanchnic SNA (Spl; green), renal SNA (magenta) and lumbar SNA (orange) of a SHAM rat (left) and of a CB-X rat (right) in response to KCN (red arrowhead, 40  $\mu$ g, IV) under anesthetized conditions. **B.** Summary data showing the changes in mean ABP, Splanchnic SNA, Renal SNA and Lumbar SNA in response to KCN from SHAM (filled symbols, n = 6) and CB-X (open symbols, n = 6) rats. For each rat, baseline rectified and integrated SNA was normalized to 100% and the peak changes in response to KCN were calculated. The sympathetic and blood pressure responses to KCN were significantly attenuated in CB-X rats, confirming the efficacy of bilateral carotid body ablation:  $\Delta$  Spl SNA (SHAM,  $48 \pm 11$  %; CB-X,  $7 \pm 1$  %;  $U = 0$ ,  $z = -2.882$ ,  $p = 0.002$ , Mann-Whitney  $U$ -test),  $\Delta$  Renal SNA (SHAM,  $50 \pm 9$  %; CB-X,  $4 \pm 2$  %;  $t(5.452) = 4.815$ ,  $p = 0.004$ , Welch's  $t$ -test),  $\Delta$  Lumbar SNA (SHAM,  $15 \pm 2$  %; CB-X,  $1 \pm 3$  %;  $t(10) = 3.547$ ,  $p = 0.005$ , Student's  $t$ -test), and  $\Delta$  Mean ABP (SHAM,  $9 \pm 1$  mmHg; CB-X,  $4 \pm 1$  %;  $t(10) = 6.644$ ,  $p < 0.001$ , Student's  $t$ -test). \* $p < 0.05$  and \*\*\* $p < 0.001$ . Data are means  $\pm$  SEM.



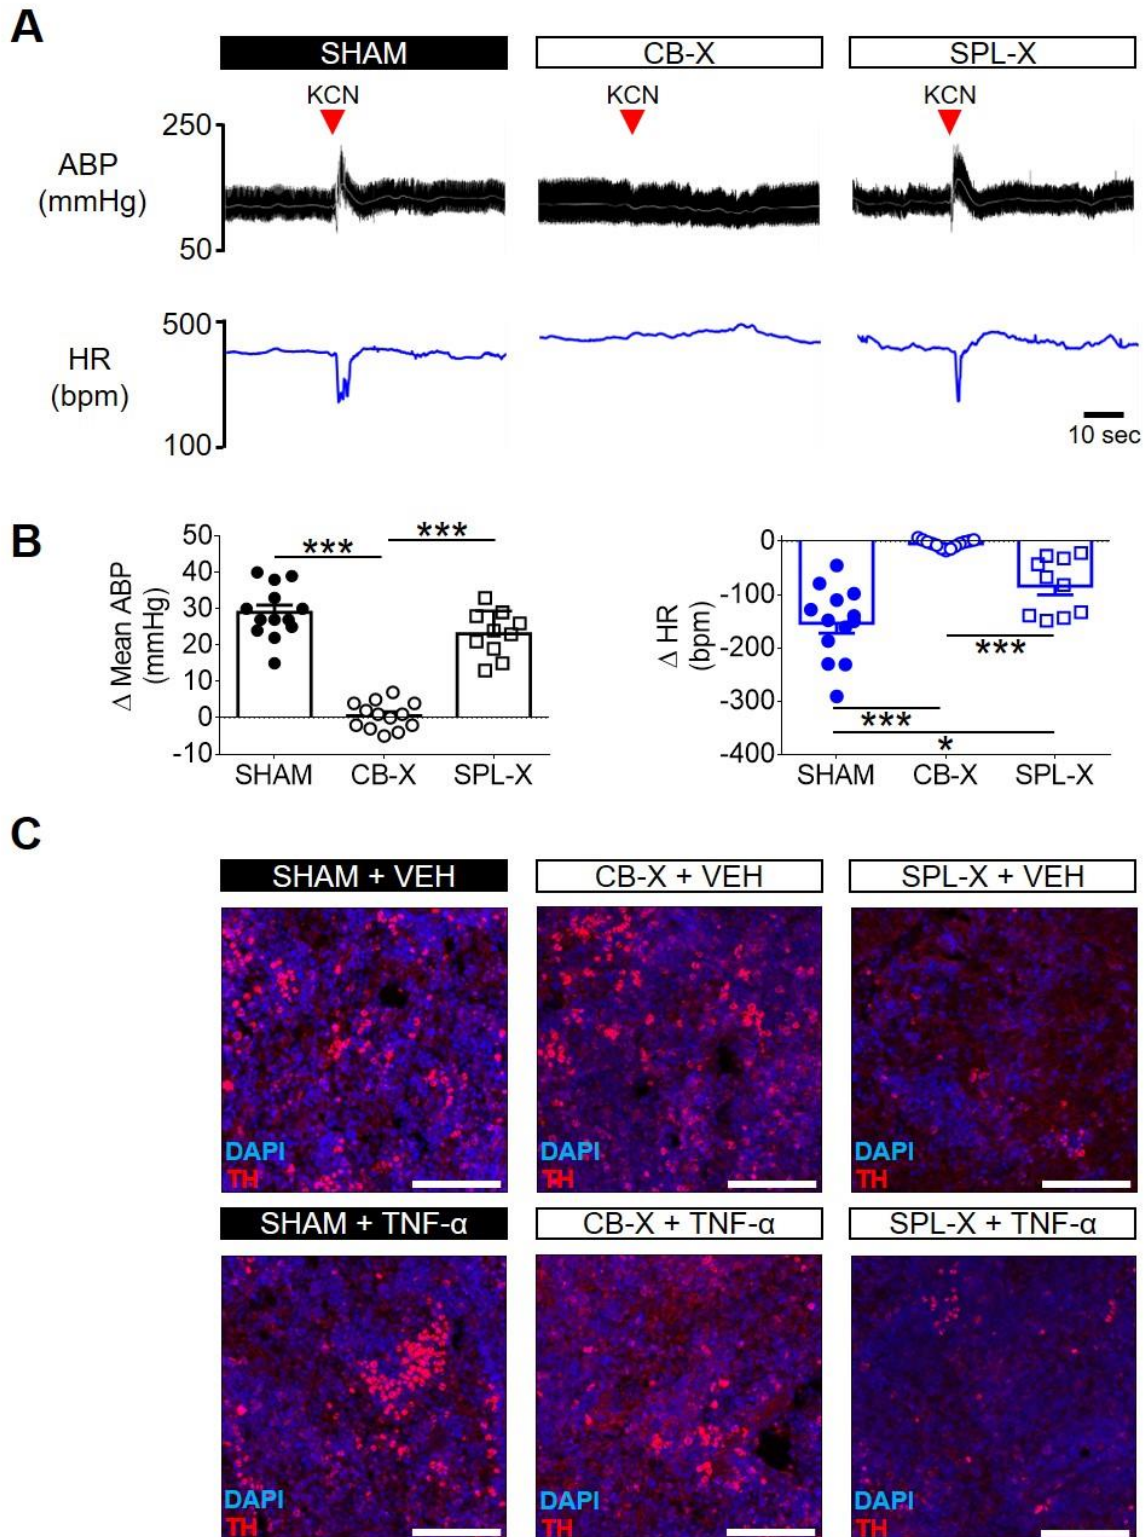

1457  
1458  
1459  
1460  
1461  
1462  
1463  
1464  
1465  
1466

**Figure supplement 3.** Verification of carotid body ablation and splanchnic sympathetic denervation in *experiment 5*. **A.** Representative tracings of arterial blood pressure (pulsatile ABP, black; mean ABP, white) and heart rate (HR; blue) of a SHAM rat (left), of a CB-X rat (middle), and of a SPL-X rat (right) in response to KCN (red arrowhead, 40  $\mu$ g, IV) under unanesthetized conditions. **B.** Summary data showing the peak changes in mean ABP (black graphs, left) and HR (blue graphs, right) in response to KCN from SHAM (filled circles, n = 13), CB-X (open circles, n = 13), and SPL-X (open squares, n = 10) rats. The cardiovascular (mean ABP and HR) responses to carotid body stimulation by intravenous KCN were abolished in CB-X rats, confirming the efficacy of bilateral carotid body ablation:  $\Delta$  mean ABP (SHAM,  $29 \pm 2$  mmHg; CB-X,  $1 \pm 1$  mmHg; SPL-X,  $23 \pm 2$ ) and  $\Delta$  mean HR (SHAM,  $-154 \pm 19$  bpm;

1467 CB-X,  $-4 \pm 2$  bpm; SPL-X,  $-84 \pm 17$ ). Regarding  $\Delta$  mean ABP, a one-way ANOVA detected statistically  
1468 significant differences between groups,  $F_{(2, 33)} = 83.134$ ,  $p < 0.001$ . Subsequent post hoc analysis with  
1469 a Bonferroni adjustment revealed that the mean difference in  $\Delta$  mean ABP between CB-X and SHAM  
1470 rats was statistically significant ( $-28$  mmHg, 95% CI  $[-34, -23]$ ,  $p < 0.001$ ) as well as the mean difference  
1471 in  $\Delta$  mean ABP between CB-X and SPL-X rats ( $-22$  mmHg, 95% CI  $[-29, -16]$ ,  $p < 0.001$ ). Regarding  $\Delta$   
1472 HR, a Welch ANOVA detected statistically significant differences between groups,  $F_{(2, 14.078)} = 40.040$ ,  
1473  $p < 0.001$ . Games-Howell post hoc analysis revealed that the mean difference in  $\Delta$  HR between CB-X  
1474 and SHAM rats was statistically significant (149 bpm, 95% CI  $[99, 200]$ ,  $p < 0.001$ ) as well as the mean  
1475 difference in  $\Delta$  mean HR between CB-X and SPL-X rats (79 bpm, 95% CI  $[33, 126]$ ,  $p = 0.003$ ). In  
1476 addition, the mean difference in  $\Delta$  mean HR between SHAM and SPL-X rats was also statistically  
1477 significant ( $-70$  bpm, 95% CI  $[-133, -7]$ ,  $p = 0.029$ ). \* $p < 0.05$  and \*\*\* $p < 0.001$ . Data are means  $\pm$  SEM.  
1478 **C.** Representative images of spleen sections from one animal of each group obtained at the end of  
1479 *experiment 5* and processed for nuclear staining (DAPI, blue) and tyrosine hydroxylase (TH, red). Note  
1480 that TH staining is substantially less pronounced in the animals subjected to splanchnic sympathetic  
1481 denervation (SPL-X + VEH, upper right panel; and SPL-X + TNF- $\alpha$ , bottom right panel) as compared to  
1482 SHAM (SHAM + VEH, upper left panel; and SHAM + TNF- $\alpha$ , bottom left panel) and CB-X (CB-X + VEH,  
1483 upper middle panel; and CB-X + TNF- $\alpha$ , bottom middle panel). VEH, vehicle. Scale bars: 100  $\mu$ m.
